# Supplementary material for: Fine-tuning of coumaric acid synthesis to increase naringenin production in yeast
Source: bioRxiv or medRxiv preprint supplement (doi:10.1101/2022.06.20.496858), 2022-06-20
Supplement: Supplementary file [file media-1.pdf]

# **Fine-tuning of coumaric acid synthesis to increase naringenin production in yeast**

Jiwei Mao<sup>a</sup>, Marta Tous Mohedano<sup>a</sup>, Xiaowei Li<sup>a</sup>, Quanli Liu<sup>a</sup>, Jens Nielsen<sup>a,b</sup>, Verena Siewers<sup>a</sup>, Yun Chen<sup>a\*</sup>

<sup>a</sup>Department of Biology and Biological Engineering, Chalmers University of Technology, SE412 96 Gothenburg, Sweden

<sup>b</sup>BioInnovation Institute, DK2200 Copenhagen N, Denmark

Figure S1.

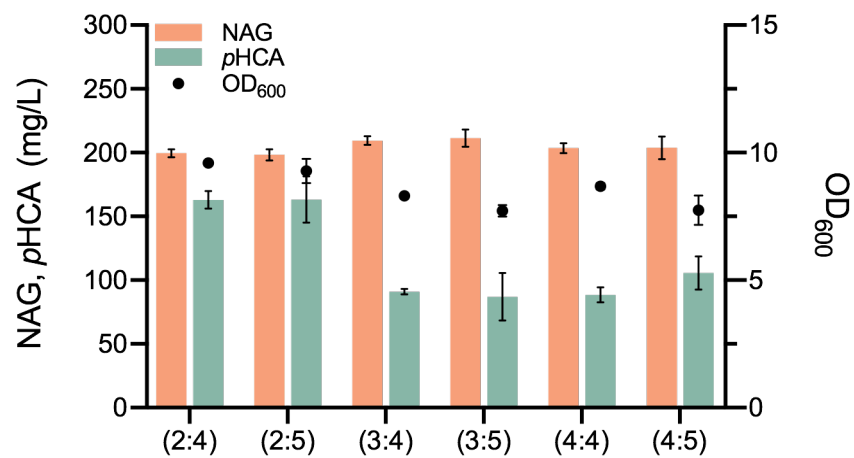

**Figure S1. Optimization of the downstream enzymes of *p*-coumaric acid for (2S)-naringenin production.** The numbers (n : n) indicate the respective gene copy numbers of *4CL* and *CHS&CHI*. Cells were grown in a defined minimal medium with 30 g/L glucose as the sole carbon source, and cultures were sampled after 96 h of growth for metabolite analysis. All data represent the mean of n = 3 biologically independent samples and error bars show standard deviation.

Figure S2

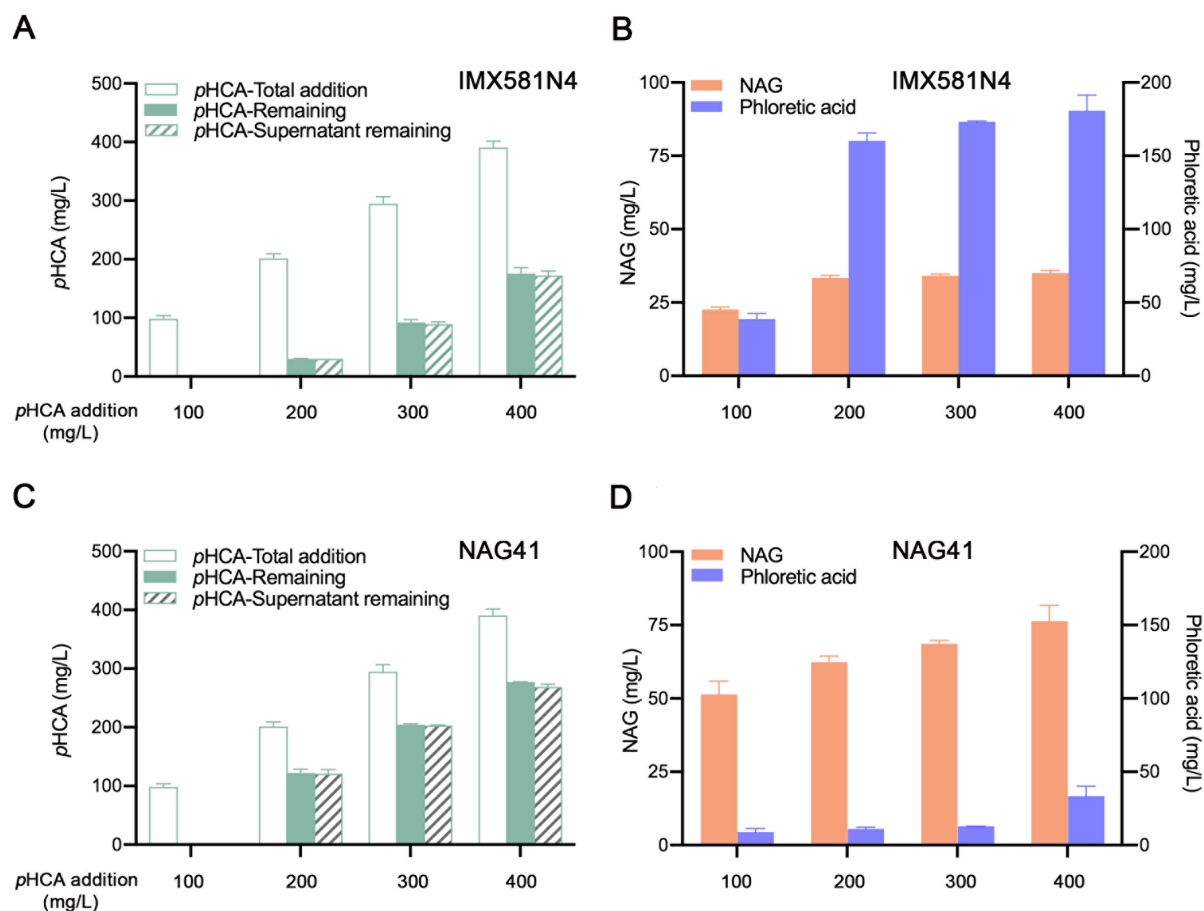

**Figure S2. Production of (2S)-naringenin in strains supplemented with different concentrations of *p*-coumaric acid.** (A) (B) (2S)-naringenin production by the IMX581N4 strain expressing one copy of *4CL* and *CHS&CHI* with the supplementary of different concentrations of *p*-coumaric acid. Cells were grown in a defined minimal medium with 30 g/L glucose as the sole carbon source and with supplemented *p*-coumaric acid (100, 200, 300, 400 mg/L) as precursor. Cultures were sampled after 96 h of growth for metabolite detection. (C) (D) Production of (2S)-naringenin in strain NAG41 supplemented with different concentrations of *p*-coumaric acid. Strain NAG41 harboring three copies of *4CL* and four copies of *CHS&CHI*, simultaneously expressing the *ACC1* mutant and the malonate assimilation pathway (*matBC*). Cells were grown in a defined minimal medium with 30 g/L glucose as the sole carbon source and 2 g/L sodium malonate dibasic, and with supplemented *p*-coumaric acid (100, 200, 300, 400 mg/L) as precursor. Cultures were sampled after 96 h of growth for metabolite analysis. All data represent the mean of  $n \geq 2$  biologically independent samples and error bars show standard deviation.

**Supplementary Table 1. *S. cerevisiae* strains used in this study.**

| Strain ID | Genotype                                                                                                                                                                                                                                                                                                                                                                                                       | Parental strain | Origin    |
|-----------|----------------------------------------------------------------------------------------------------------------------------------------------------------------------------------------------------------------------------------------------------------------------------------------------------------------------------------------------------------------------------------------------------------------|-----------------|-----------|
| IMX581    | <i>MATa ura3-52 can1Δ :: cas9-natNT2 TRP1 LEU2 HIS3</i>                                                                                                                                                                                                                                                                                                                                                        |                 | (1)       |
| QL01      | <i>MATa ura3-52 can1Δ::cas9-natNT2 TRP1 LEU2 HIS3 XII-2::(GPM1p-AtPAL2-FBA1t)+(TDH3p-AtC4H-CYC1t)+(tHXT7p-AtATR2-pYX212t)+(PGK1p-CYB5-ADH1t)</i>                                                                                                                                                                                                                                                               | IMX581          | (2)       |
| NAG01     | <i>MATa ura3-52 can1Δ::cas9-natNT2 TRP1 LEU2 HIS3 XII-2::(GPM1p-AtPAL2-FBA1t)+(TDH3p-AtC4H-CYC1t)+(tHXT7p-AtATR2-pYX212t)+(PGK1p-CYB5-ADH1t) XII-4::(TDH3p-At4CL-ADH1t) + (TDH2t-HaCHS-CCW12p)+(tHXT7p-PhCHI-FBAt)</i>                                                                                                                                                                                         | QL01            | This work |
| NAG02     | <i>MATa ura3-52 can1Δ::cas9-natNT2 TRP1 LEU2 HIS3 XII-2::(GPM1p-AtPAL2-FBA1t)+(TDH3p-AtC4H-CYC1t)+(tHXT7p-AtATR2-pYX212t)+(PGK1p-CYB5-ADH1t) XII-4::(TDH3p-At4CL-ADH1t) + (TDH2t-HaCHS-CCW12p)+(tHXT7p-PsCHI-FBAt)</i>                                                                                                                                                                                         | QL01            | This work |
| NAG03     | <i>MATa ura3-52 can1Δ::cas9-natNT2 TRP1 LEU2 HIS3 XII-2::(GPM1p-AtPAL2-FBA1t)+(TDH3p-AtC4H-CYC1t)+(tHXT7p-AtATR2-pYX212t)+(PGK1p-CYB5-ADH1t) XII-4::(TDH3p-At4CL-ADH1t) + (TDH2t-HaCHS-CCW12p)+(tHXT7p-SmCHI-FBAt)</i>                                                                                                                                                                                         | QL01            | This work |
| NAG04     | <i>MATa ura3-52 can1Δ::cas9-natNT2 TRP1 LEU2 HIS3 XII-2::(GPM1p-AtPAL2-FBA1t)+(TDH3p-AtC4H-CYC1t)+(tHXT7p-AtATR2-pYX212t)+(PGK1p-CYB5-ADH1t) XII-4::(TDH3p-At4CL-ADH1t) + (TDH2t-RsCHS-CCW12p)+(tHXT7p-PhCHI-FBAt)</i>                                                                                                                                                                                         | QL01            | This work |
| NAG05     | <i>MATa ura3-52 can1Δ::cas9-natNT2 TRP1 LEU2 HIS3 XII-2::(GPM1p-AtPAL2-FBA1t)+(TDH3p-AtC4H-CYC1t)+(tHXT7p-AtATR2-pYX212t)+(PGK1p-CYB5-ADH1t) XII-4::(TDH3p-At4CL-ADH1t) + (TDH2t-RsCHS-CCW12p)+(tHXT7p-PsCHI-FBAt)</i>                                                                                                                                                                                         | QL01            | This work |
| NAG06     | <i>MATa ura3-52 can1Δ::cas9-natNT2 TRP1 LEU2 HIS3 XII-2::(GPM1p-AtPAL2-FBA1t)+(TDH3p-AtC4H-CYC1t)+(tHXT7p-AtATR2-pYX212t)+(PGK1p-CYB5-ADH1t) XII-4::(TDH3p-At4CL-ADH1t) + (TDH2t-RsCHS-CCW12p)+(tHXT7p-SmCHI-FBAt)</i>                                                                                                                                                                                         | QL01            | This work |
| NAG07     | <i>MATa ura3-52 can1Δ::cas9-natNT2 TRP1 LEU2 HIS3 XII-2::(GPM1p-AtPAL2-FBA1t)+(TDH3p-AtC4H-CYC1t)+(tHXT7p-AtATR2-pYX212t)+(PGK1p-CYB5-ADH1t) XII-4:: (TDH3p-At4CL-ADH1t) + (TDH2t-SmCHS-CCW12p)+(tHXT7p-PhCHI-FBAt)</i>                                                                                                                                                                                        | QL01            | This work |
| NAG08     | <i>MATa ura3-52 can1Δ::cas9-natNT2 TRP1 LEU2 HIS3 XII-2::(GPM1p-AtPAL2-FBA1t)+(TDH3p-AtC4H-CYC1t)+(tHXT7p-AtATR2-pYX212t)+(PGK1p-CYB5-ADH1t) XII-4::(TDH3p-At4CL-ADH1t) + (TDH2t-SmCHS-CCW12p)+(tHXT7p-PsCHI-FBAt)</i>                                                                                                                                                                                         | QL01            | This work |
| NAG09     | <i>MATa ura3-52 can1Δ::cas9-natNT2 TRP1 LEU2 HIS3 XII-2::(GPM1p-AtPAL2-FBA1t)+(TDH3p-AtC4H-CYC1t)+(tHXT7p-AtATR2-pYX212t)+(PGK1p-CYB5-ADH1t) XII-4::(TDH3p-At4CL-ADH1t) + (TDH2t-SmCHS-CCW12p)+(tHXT7p-SmCHI-FBAt)</i>                                                                                                                                                                                         | QL01            | This work |
| NAG10     | <i>MATa ura3-52 can1Δ::cas9-natNT2 TRP1 LEU2 HIS3 XII-2::(GPM1p-AtPAL2-FBA1t)+(TDH3p-AtC4H-CYC1t)+(tHXT7p-AtATR2-pYX212t)+(PGK1p-CYB5-ADH1t) X-3::(TPI1p-EcaroL-pYX212t)+(ADH1t-ARO7<sup>G141S</sup>-TEF1p)+(PGK1p-ARO4<sup>K229L</sup>-CYC1t) X-4::(CYC1t-ARO1-TPI1p)+(TDH3p-ARO2-ADH1t)+(TDH2t-ARO3-TEF1p) XII-4::(TDH3p-At4CL-ADH1t) + (TDH2t-RsCHS-CCW12p)+(tHXT7p-PsCHI-FBAt)</i>                         | NAG05           | This work |
| NAG11     | <i>MATa ura3-52 can1Δ::cas9-natNT2 TRP1 LEU2 HIS3 XII-2::(GPM1p-AtPAL2-FBA1t)+(TDH3p-AtC4H-CYC1t)+(tHXT7p-AtATR2-pYX212t)+(PGK1p-CYB5-ADH1t) X-3::(TPI1p-EcaroL-pYX212t)+(ADH1t-ARO7<sup>G141S</sup>-TEF1p)+(PGK1p-ARO4<sup>K229L</sup>-CYC1t) X-4::(CYC1t-ARO1-TPI1p)+(TDH3p-ARO2-ADH1t)+(TDH2t-ARO3-TEF1p) X-2::(GPM1p-PHA2-CYC1t) XII-4::(TDH3p-At4CL-ADH1t) + (TDH2t-RsCHS-CCW12p)+(tHXT7p-PsCHI-FBAt)</i> | NAG010          | This work |
| NAG1-2    | <i>MATa ura3-52 can1Δ::cas9-natNT2 TRP1 LEU2 HIS3 XII-2::(GPM1p-AtPAL2-FBA1t)+(TDH3p-AtC4H-CYC1t)+(tHXT7p-AtATR2-pYX212t)+(PGK1p-CYB5-ADH1t) X-3::(TPI1p-EcaroL-pYX212t)+(ADH1t-ARO7<sup>G141S</sup>-TEF1p)+(PGK1p-ARO4<sup>K229L</sup>-CYC1t) X-4::(CYC1t-ARO1-TPI1p)+(TDH3p-ARO2-ADH1t)+(TDH2t-ARO3-TEF1p) XII-4::(TDH3p-At4CL-ADH1t) + (TDH2t-RsCHS-</i>                                                    | NAG010          | This work |

|        |                                                                                                                                                                                                                                                                                                                                                                                                                                                                                                                                                      |        |           |
|--------|------------------------------------------------------------------------------------------------------------------------------------------------------------------------------------------------------------------------------------------------------------------------------------------------------------------------------------------------------------------------------------------------------------------------------------------------------------------------------------------------------------------------------------------------------|--------|-----------|
|        | CCW12p)+(tHXT7p-PsCHI-FBA) XII-5::(pYX212t-PsCHI-PGKp)+ (TEF1p-RsCHS-FBA)                                                                                                                                                                                                                                                                                                                                                                                                                                                                            |        |           |
| NAG1-3 | MATa ura3-52 can1Δ::cas9-natNT2 TRP1 LEU2 HIS3 XII-2::(GPM1p-AtPAL2-FBA1t)+(TDH3p-AtC4H-CYC1t)+(tHXT7p-AtATR2-pYX212t)+(PGK1p-CYB5-ADH1t) X-3::(TPI1p-EcaroL-pYX212t)+(ADH1t-ARO7 <sup>G141S</sup> -TEF1p)+(PGK1p-ARO4 <sup>K229L</sup> -CYC1t) X-4::(CYC1t-ARO1-TPI1p)+(TDH3p-ARO2-ADH1t)+(TDH2t-ARO3-TEF1p) XII-4::(TDH3p-At4CL-ADH1t) + (TDH2t-RsCHS-CCW12p)+(tHXT7p-PsCHI-FBA) XII-5::(pYX212t-PsCHI-PGKp)+ (TEF1p-RsCHS-FBA) XI-1::(pYX212t-PsCHI-PGKp)+ (TEF1p-RsCHS-FBA)                                                                      | NAG1-2 | This work |
| NAG1-4 | MATa ura3-52 can1Δ::cas9-natNT2 TRP1 LEU2 HIS3 XII-2::(GPM1p-AtPAL2-FBA1t)+(TDH3p-AtC4H-CYC1t)+(tHXT7p-AtATR2-pYX212t)+(PGK1p-CYB5-ADH1t) X-3::(TPI1p-EcaroL-pYX212t)+(ADH1t-ARO7 <sup>G141S</sup> -TEF1p)+(PGK1p-ARO4 <sup>K229L</sup> -CYC1t) X-4::(CYC1t-ARO1-TPI1p)+(TDH3p-ARO2-ADH1t)+(TDH2t-ARO3-TEF1p) XII-4::(TDH3p-At4CL-ADH1t) + (TDH2t-RsCHS-CCW12p)+(tHXT7p-PsCHI-FBA) XII-5::(pYX212t-PsCHI-PGKp)+ (TEF1p-RsCHS-FBA) XI-1::(pYX212t-PsCHI-PGKp)+ (TEF1p-RsCHS-FBA) XII-1::(TDH2t-RsCHS-CCW12p)+(tHXT7p-PsCHI-FBA)                       | NAG1-3 | This work |
| NAG2-1 | MATa ura3-52 can1Δ::cas9-natNT2 TRP1 LEU2 HIS3 XII-2::(GPM1p-AtPAL2-FBA1t)+(TDH3p-AtC4H-CYC1t)+(tHXT7p-AtATR2-pYX212t)+(PGK1p-CYB5-ADH1t) X-3::(TPI1p-EcaroL-pYX212t)+(ADH1t-ARO7 <sup>G141S</sup> -TEF1p)+(PGK1p-ARO4 <sup>K229L</sup> -CYC1t) X-4::(CYC1t-ARO1-TPI1p)+(TDH3p-ARO2-ADH1t)+(TDH2t-ARO3-TEF1p) XII-4::(TDH3p-At4CL-ADH1t) + (TDH2t-RsCHS-CCW12p)+(tHXT7p-PsCHI-FBA) XII-1::(TDH3p-At4CL-ADH1t)                                                                                                                                        | NAG010 | This work |
| NAG2-2 | MATa ura3-52 can1Δ::cas9-natNT2 TRP1 LEU2 HIS3 XII-2::(GPM1p-AtPAL2-FBA1t)+(TDH3p-AtC4H-CYC1t)+(tHXT7p-AtATR2-pYX212t)+(PGK1p-CYB5-ADH1t) X-3::(TPI1p-EcaroL-pYX212t)+(ADH1t-ARO7 <sup>G141S</sup> -TEF1p)+(PGK1p-ARO4 <sup>K229L</sup> -CYC1t) X-4::(CYC1t-ARO1-TPI1p)+(TDH3p-ARO2-ADH1t)+(TDH2t-ARO3-TEF1p) XII-4::(TDH3p-At4CL-ADH1t) + (TDH2t-RsCHS-CCW12p)+(tHXT7p-PsCHI-FBA) XII-1::(TDH3p-At4CL-ADH1t) + (TDH2t-RsCHS-CCW12p)+(tHXT7p-PsCHI-FBA)                                                                                              | NAG10  | This work |
| NAG2-3 | MATa ura3-52 can1Δ::cas9-natNT2 TRP1 LEU2 HIS3 XII-2::(GPM1p-AtPAL2-FBA1t)+(TDH3p-AtC4H-CYC1t)+(tHXT7p-AtATR2-pYX212t)+(PGK1p-CYB5-ADH1t) X-3::(TPI1p-EcaroL-pYX212t)+(ADH1t-ARO7 <sup>G141S</sup> -TEF1p)+(PGK1p-ARO4 <sup>K229L</sup> -CYC1t) X-4::(CYC1t-ARO1-TPI1p)+(TDH3p-ARO2-ADH1t)+(TDH2t-ARO3-TEF1p) XII-4::(TDH3p-At4CL-ADH1t) + (TDH2t-RsCHS-CCW12p)+(tHXT7p-PsCHI-FBA) XII-1::(TDH3p-At4CL-ADH1t) + (TDH2t-RsCHS-CCW12p)+(tHXT7p-PsCHI-FBA) XII-5::(pYX212t-PsCHI-PGKp)+ (TEF1p-RsCHS-FBA)                                               | NAG2-2 | This work |
| NAG2-4 | MATa ura3-52 can1Δ::cas9-natNT2 TRP1 LEU2 HIS3 XII-2::(GPM1p-AtPAL2-FBA1t)+(TDH3p-AtC4H-CYC1t)+(tHXT7p-AtATR2-pYX212t)+(PGK1p-CYB5-ADH1t) X-3::(TPI1p-EcaroL-pYX212t)+(ADH1t-ARO7 <sup>G141S</sup> -TEF1p)+(PGK1p-ARO4 <sup>K229L</sup> -CYC1t) X-4::(CYC1t-ARO1-TPI1p)+(TDH3p-ARO2-ADH1t)+(TDH2t-ARO3-TEF1p) XII-4::(TDH3p-At4CL-ADH1t) + (TDH2t-RsCHS-CCW12p)+(tHXT7p-PsCHI-FBA) XII-1::(TDH3p-At4CL-ADH1t) + (TDH2t-RsCHS-CCW12p)+(tHXT7p-PsCHI-FBA) XII-5::(pYX212t-PsCHI-PGKp)+ (TEF1p-RsCHS-FBA) XI-1::(pYX212t-PsCHI-PGKp)+ (TEF1p-RsCHS-FBA) | NAG2-3 | This work |
| NAG3-1 | MATa ura3-52 can1Δ::cas9-natNT2 TRP1 LEU2 HIS3 XII-2::(GPM1p-AtPAL2-FBA1t)+(TDH3p-AtC4H-CYC1t)+(tHXT7p-AtATR2-pYX212t)+(PGK1p-CYB5-ADH1t) X-3::(TPI1p-EcaroL-pYX212t)+(ADH1t-ARO7 <sup>G141S</sup> -TEF1p)+(PGK1p-ARO4 <sup>K229L</sup> -CYC1t) X-4::(CYC1t-ARO1-TPI1p)+(TDH3p-ARO2-ADH1t)+(TDH2t-ARO3-TEF1p) XII-4::(TDH3p-At4CL-ADH1t) + (TDH2t-RsCHS-CCW12p)+(tHXT7p-PsCHI-FBA) XII-1::(TDH3p-At4CL-ADH1t) XII-5::(CYC1t-At4CL-TPIp)                                                                                                              | NAG2-1 | This work |
| NAG3-2 | MATa ura3-52 can1Δ::cas9-natNT2 TRP1 LEU2 HIS3 XII-2::(GPM1p-AtPAL2-FBA1t)+(TDH3p-AtC4H-CYC1t)+(tHXT7p-AtATR2-pYX212t)+(PGK1p-CYB5-ADH1t) X-3::(TPI1p-EcaroL-pYX212t)+(ADH1t-ARO7 <sup>G141S</sup> -TEF1p)+(PGK1p-ARO4 <sup>K229L</sup> -CYC1t) X-4::(CYC1t-ARO1-TPI1p)+(TDH3p-ARO2-ADH1t)+(TDH2t-ARO3-TEF1p) XII-4::(TDH3p-At4CL-ADH1t) + (TDH2t-RsCHS-CCW12p)+(tHXT7p-PsCHI-FBA) XII-1::(TDH3p-At4CL-ADH1t) + (TDH2t-RsCHS-CCW12p)+(tHXT7p-PsCHI-FBA) XII-5::(CYC1t-At4CL-TPIp)                                                                    | NAG2-2 | This work |

|           |                                                                                                                                                                                                                                                                                                                                                                                                                                                                                                                                                                                                         |           |           |
|-----------|---------------------------------------------------------------------------------------------------------------------------------------------------------------------------------------------------------------------------------------------------------------------------------------------------------------------------------------------------------------------------------------------------------------------------------------------------------------------------------------------------------------------------------------------------------------------------------------------------------|-----------|-----------|
| NAG3-3    | <i>MATa ura3-52 can1Δ::cas9-natNT2 TRP1 LEU2 HIS3 XII-2::(GPM1p-AtPAL2-FBA1t)+(TDH3p-AtC4H-CYC1t)+(tHXT7p-AtATR2-pYX212t)+(PGK1p-CYB5-ADH1t) X-3::(TPI1p-EcaroL-pYX212t)+(ADH1t-ARO7<sup>G141S</sup>-TEF1p)+(PGK1p-ARO4<sup>K229L</sup>-CYC1t) X-4::(CYC1t-ARO1-TPI1p)+(TDH3p-ARO2-ADH1t)+(TDH2t-ARO3-TEF1p) XII-4::(TDH3p-At4CL-ADH1t) + (TDH2t-RsCHS-CCW12p)+(tHXT7p-PsCHI-FBA1t) XII-1::(TDH3p-At4CL-ADH1t) + (TDH2t-RsCHS-CCW12p)+(tHXT7p-PsCHI-FBA1t) XII-5::(pYX212t-PsCHI-PGKp)+(TEF1p-RsCHS-FBA1t) + (CYC1t-At4CL-TPIp)</i>                                                                     | NAG2-2    | This work |
| NAG3-4    | <i>MATa ura3-52 can1Δ::cas9-natNT2 TRP1 LEU2 HIS3 XII-2::(GPM1p-AtPAL2-FBA1t)+(TDH3p-AtC4H-CYC1t)+(tHXT7p-AtATR2-pYX212t)+(PGK1p-CYB5-ADH1t) X-3::(TPI1p-EcaroL-pYX212t)+(ADH1t-ARO7<sup>G141S</sup>-TEF1p)+(PGK1p-ARO4<sup>K229L</sup>-CYC1t) X-4::(CYC1t-ARO1-TPI1p)+(TDH3p-ARO2-ADH1t)+(TDH2t-ARO3-TEF1p) XII-4::(TDH3p-At4CL-ADH1t) + (TDH2t-RsCHS-CCW12p)+(tHXT7p-PsCHI-FBA1t) XII-1::(TDH3p-At4CL-ADH1t) + (TDH2t-RsCHS-CCW12p)+(tHXT7p-PsCHI-FBA1t) XII-5::(pYX212t-PsCHI-PGKp)+(TEF1p-RsCHS-FBA1t) + (CYC1t-At4CL-TPIp) XI-1::(pYX212t-PsCHI-PGKp)+(TEF1p-RsCHS-FBA1t)</i>                      | NAG3-3    | This work |
| NAG4-1    | <i>MATa ura3-52 can1Δ::cas9-natNT2 TRP1 LEU2 HIS3 XII-2::(GPM1p-AtPAL2-FBA1t)+(TDH3p-AtC4H-CYC1t)+(tHXT7p-AtATR2-pYX212t)+(PGK1p-CYB5-ADH1t) X-3::(TPI1p-EcaroL-pYX212t)+(ADH1t-ARO7<sup>G141S</sup>-TEF1p)+(PGK1p-ARO4<sup>K229L</sup>-CYC1t) X-4::(CYC1t-ARO1-TPI1p)+(TDH3p-ARO2-ADH1t)+(TDH2t-ARO3-TEF1p) XII-4::(TDH3p-At4CL-ADH1t) + (TDH2t-RsCHS-CCW12p)+(tHXT7p-PsCHI-FBA1t) XII-1::(TDH3p-At4CL-ADH1t) XII-5::(CYC1t-At4CL-TPIp) XI-1::(CYC1t-At4CL-TPIp)</i>                                                                                                                                   | NAG3-1    | This work |
| NAG4-2    | <i>MATa ura3-52 can1Δ::cas9-natNT2 TRP1 LEU2 HIS3 XII-2::(GPM1p-AtPAL2-FBA1t)+(TDH3p-AtC4H-CYC1t)+(tHXT7p-AtATR2-pYX212t)+(PGK1p-CYB5-ADH1t) X-3::(TPI1p-EcaroL-pYX212t)+(ADH1t-ARO7<sup>G141S</sup>-TEF1p)+(PGK1p-ARO4<sup>K229L</sup>-CYC1t) X-4::(CYC1t-ARO1-TPI1p)+(TDH3p-ARO2-ADH1t)+(TDH2t-ARO3-TEF1p) XII-4::(TDH3p-At4CL-ADH1t) + (TDH2t-RsCHS-CCW12p)+(tHXT7p-PsCHI-FBA1t) XII-1::(TDH3p-At4CL-ADH1t) + (TDH2t-RsCHS-CCW12p)+(tHXT7p-PsCHI-FBA1t) XII-5::(CYC1t-At4CL-TPIp) XI-1::(CYC1t-At4CL-TPIp)</i>                                                                                       | NAG3-2    | This work |
| NAG4-3    | <i>MATa ura3-52 can1Δ::cas9-natNT2 TRP1 LEU2 HIS3 XII-2::(GPM1p-AtPAL2-FBA1t)+(TDH3p-AtC4H-CYC1t)+(tHXT7p-AtATR2-pYX212t)+(PGK1p-CYB5-ADH1t) X-3::(TPI1p-EcaroL-pYX212t)+(ADH1t-ARO7<sup>G141S</sup>-TEF1p)+(PGK1p-ARO4<sup>K229L</sup>-CYC1t) X-4::(CYC1t-ARO1-TPI1p)+(TDH3p-ARO2-ADH1t)+(TDH2t-ARO3-TEF1p) XII-4::(TDH3p-At4CL-ADH1t) + (TDH2t-RsCHS-CCW12p)+(tHXT7p-PsCHI-FBA1t) XII-1::(TDH3p-At4CL-ADH1t) + (TDH2t-RsCHS-CCW12p)+(tHXT7p-PsCHI-FBA1t) XII-5::(pYX212t-PsCHI-PGKp)+(TEF1p-RsCHS-FBA1t) + (CYC1t-At4CL-TPIp) XI-1::(CYC1t-At4CL-TPIp)</i>                                            | NAG3-3    | This work |
| NAG4-4    | <i>MATa ura3-52 can1Δ::cas9-natNT2 TRP1 LEU2 HIS3 XII-2::(GPM1p-AtPAL2-FBA1t)+(TDH3p-AtC4H-CYC1t)+(tHXT7p-AtATR2-pYX212t)+(PGK1p-CYB5-ADH1t) X-3::(TPI1p-EcaroL-pYX212t)+(ADH1t-ARO7<sup>G141S</sup>-TEF1p)+(PGK1p-ARO4<sup>K229L</sup>-CYC1t) X-4::(CYC1t-ARO1-TPI1p)+(TDH3p-ARO2-ADH1t)+(TDH2t-ARO3-TEF1p) XII-4::(TDH3p-At4CL-ADH1t) + (TDH2t-RsCHS-CCW12p)+(tHXT7p-PsCHI-FBA1t) XII-1::(TDH3p-At4CL-ADH1t) + (TDH2t-RsCHS-CCW12p)+(tHXT7p-PsCHI-FBA1t) XII-5::(pYX212t-PsCHI-PGKp)+(TEF1p-RsCHS-FBA1t) + (CYC1t-At4CL-TPIp) XI-1::(pYX212t-PsCHI-PGKp)+(TEF1p-RsCHS-FBA1t) + (CYC1t-At4CL-TPIp)</i> | NAG3-3    | This work |
| NAG-CHS*2 | <i>MATa ura3-52 can1Δ::cas9-natNT2 TRP1 LEU2 HIS3 XII-2::(GPM1p-AtPAL2-FBA1t)+(TDH3p-AtC4H-CYC1t)+(tHXT7p-AtATR2-pYX212t)+(PGK1p-CYB5-ADH1t) X-3::(TPI1p-EcaroL-pYX212t)+(ADH1t-ARO7<sup>G141S</sup>-TEF1p)+(PGK1p-ARO4<sup>K229L</sup>-CYC1t) X-4::(CYC1t-ARO1-TPI1p)+(TDH3p-ARO2-ADH1t)+(TDH2t-ARO3-TEF1p) XII-4::(TDH3p-At4CL-ADH1t) + (TDH2t-RsCHS-CCW12p)+(tHXT7p-PsCHI-FBA1t) XII-5::(TEF1p-RsCHS-FBA1t)</i>                                                                                                                                                                                      | NAG10     | This work |
| NAG-CHS*3 | <i>MATa ura3-52 can1Δ::cas9-natNT2 TRP1 LEU2 HIS3 XII-2::(GPM1p-AtPAL2-FBA1t)+(TDH3p-AtC4H-CYC1t)+(tHXT7p-AtATR2-pYX212t)+(PGK1p-CYB5-ADH1t) X-3::(TPI1p-EcaroL-pYX212t)+(ADH1t-ARO7<sup>G141S</sup>-TEF1p)+(PGK1p-ARO4<sup>K229L</sup>-CYC1t) X-4::(CYC1t-ARO1-TPI1p)+(TDH3p-ARO2-ADH1t)+(TDH2t-ARO3-TEF1p) XII-4::(TDH3p-At4CL-ADH1t) + (TDH2t-RsCHS-CCW12p)+(tHXT7p-PsCHI-FBA1t) XII-5::(TEF1p-RsCHS-FBA1t) XI-1::(TEF1p-RsCHS-FBA1t)</i>                                                                                                                                                            | NAG-CHS*2 | This work |

|           |                                                                                                                                                                                                                                                                                                                                                                                                                                                                                                                                                                                                                                                    |           |           |
|-----------|----------------------------------------------------------------------------------------------------------------------------------------------------------------------------------------------------------------------------------------------------------------------------------------------------------------------------------------------------------------------------------------------------------------------------------------------------------------------------------------------------------------------------------------------------------------------------------------------------------------------------------------------------|-----------|-----------|
| NAG-CHI*2 | <i>MATa ura3-52 can1Δ::cas9-natNT2 TRP1 LEU2 HIS3 XII-2::(GPM1p-AtPAL2-FBA1t)+(TDH3p-AtC4H-CYC1t)+(tHXT7p-AtATR2-pYX212t)+(PGK1p-CYB5-ADH1t) X-3::(TPI1p-EcaroL-pYX212t)+(ADH1t-ARO7<sup>G141S</sup>-TEF1p)+(PGK1p-ARO4<sup>K229L</sup>-CYC1t) X-4::(CYC1t-ARO1-TPI1p)+(TDH3p-ARO2-ADH1t)+(TDH2t-ARO3-TEF1p) XII-4::(TDH3p-At4CL-ADH1t) + (TDH2t-RsCHS-CCW12p)+(tHXT7p-PsCHI-FBAt) XII-5::(pYX212t-PsCHI-PGKp)</i>                                                                                                                                                                                                                                 | NAG10     | This work |
| NAG-CHI*3 | <i>MATa ura3-52 can1Δ::cas9-natNT2 TRP1 LEU2 HIS3 XII-2::(GPM1p-AtPAL2-FBA1t)+(TDH3p-AtC4H-CYC1t)+(tHXT7p-AtATR2-pYX212t)+(PGK1p-CYB5-ADH1t) X-3::(TPI1p-EcaroL-pYX212t)+(ADH1t-ARO7<sup>G141S</sup>-TEF1p)+(PGK1p-ARO4<sup>K229L</sup>-CYC1t) X-4::(CYC1t-ARO1-TPI1p)+(TDH3p-ARO2-ADH1t)+(TDH2t-ARO3-TEF1p) XII-4::(TDH3p-At4CL-ADH1t) + (TDH2t-RsCHS-CCW12p)+(tHXT7p-PsCHI-FBAt) XII-5::(pYX212t-PsCHI-PGKp) XI-1::(pYX212t-PsCHI-PGKp)</i>                                                                                                                                                                                                      | NAG-CHI*2 | This work |
| NAG2-5    | <i>MATa ura3-52 can1Δ::cas9-natNT2 TRP1 LEU2 HIS3 XII-2::(GPM1p-AtPAL2-FBA1t)+(TDH3p-AtC4H-CYC1t)+(tHXT7p-AtATR2-pYX212t)+(PGK1p-CYB5-ADH1t) X-3::(TPI1p-EcaroL-pYX212t)+(ADH1t-ARO7<sup>G141S</sup>-TEF1p)+(PGK1p-ARO4<sup>K229L</sup>-CYC1t) X-4::(CYC1t-ARO1-TPI1p)+(TDH3p-ARO2-ADH1t)+(TDH2t-ARO3-TEF1p) XII-4::(TDH3p-At4CL-ADH1t) + (TDH2t-RsCHS-CCW12p)+(tHXT7p-PsCHI-FBAt) XII-1::(TDH3p-At4CL-ADH1t) + (TDH2t-RsCHS-CCW12p)+(tHXT7p-PsCHI-FBAt) XII-5::(pYX212t-PsCHI-PGKp)+(TEF1p-RsCHS-FBAt) XI-1::(pYX212t-PsCHI-PGKp)+(TEF1p-RsCHS-FBAt) XI-3::(TDH2t-RsCHS-CCW12p)+(tHXT7p-PsCHI-FBAt)</i>                                           | NAG2-4    | This work |
| NAG3-5    | <i>MATa ura3-52 can1Δ::cas9-natNT2 TRP1 LEU2 HIS3 XII-2::(GPM1p-AtPAL2-FBA1t)+(TDH3p-AtC4H-CYC1t)+(tHXT7p-AtATR2-pYX212t)+(PGK1p-CYB5-ADH1t) X-3::(TPI1p-EcaroL-pYX212t)+(ADH1t-ARO7<sup>G141S</sup>-TEF1p)+(PGK1p-ARO4<sup>K229L</sup>-CYC1t) X-4::(CYC1t-ARO1-TPI1p)+(TDH3p-ARO2-ADH1t)+(TDH2t-ARO3-TEF1p) XII-4::(TDH3p-At4CL-ADH1t) + (TDH2t-RsCHS-CCW12p)+(tHXT7p-PsCHI-FBAt) XII-1::(TDH3p-At4CL-ADH1t) + (TDH2t-RsCHS-CCW12p)+(tHXT7p-PsCHI-FBAt) XII-5::(pYX212t-PsCHI-PGKp)+(TEF1p-RsCHS-FBAt) + (CYC1t-At4CL-TPIp) XI-1::(pYX212t-PsCHI-PGKp)+(TEF1p-RsCHS-FBAt) XI-3::(TDH2t-RsCHS-CCW12p)+(tHXT7p-PsCHI-FBAt)</i>                      | NAG3-4    | This work |
| NAG4-5    | <i>MATa ura3-52 can1Δ::cas9-natNT2 TRP1 LEU2 HIS3 XII-2::(GPM1p-AtPAL2-FBA1t)+(TDH3p-AtC4H-CYC1t)+(tHXT7p-AtATR2-pYX212t)+(PGK1p-CYB5-ADH1t) X-3::(TPI1p-EcaroL-pYX212t)+(ADH1t-ARO7<sup>G141S</sup>-TEF1p)+(PGK1p-ARO4<sup>K229L</sup>-CYC1t) X-4::(CYC1t-ARO1-TPI1p)+(TDH3p-ARO2-ADH1t)+(TDH2t-ARO3-TEF1p) XII-4::(TDH3p-At4CL-ADH1t) + (TDH2t-RsCHS-CCW12p)+(tHXT7p-PsCHI-FBAt) XII-1::(TDH3p-At4CL-ADH1t) + (TDH2t-RsCHS-CCW12p)+(tHXT7p-PsCHI-FBAt) XII-5::(pYX212t-PsCHI-PGKp)+(TEF1p-RsCHS-FBAt) + (CYC1t-At4CL-TPIp) XI-1::(pYX212t-PsCHI-PGKp)+(TEF1p-RsCHS-FBAt) + (CYC1t-At4CL-TPIp) XI-3::(TDH2t-RsCHS-CCW12p)+(tHXT7p-PsCHI-FBAt)</i> | NAG4-4    | This work |
| NAG12     | <i>MATa ura3-52 can1Δ::cas9-natNT2 TRP1 LEU2 HIS3 XII-2::(GPM1p-AtPAL2-FBA1t)+(TDH3p-AtC4H-CYC1t)+(tHXT7p-AtATR2-pYX212t)+(PGK1p-CYB5-ADH1t) X-3::(TPI1p-EcaroL-pYX212t)+(ADH1t-ARO7<sup>G141S</sup>-TEF1p)+(PGK1p-ARO4<sup>K229L</sup>-CYC1t) X-4::(CYC1t-ARO1-TPI1p)+(TDH3p-ARO2-ADH1t)+(TDH2t-ARO3-TEF1p) XII-4::(TDH3p-At4CL-ADH1t) + (TDH2t-RsCHS-CCW12p)+(tHXT7p-PsCHI-FBAt) XI-2::(TPIp-ACC1<sup>S659A,S1157A</sup>-TDH2t)</i>                                                                                                                                                                                                              | NAG010    | This work |
| NAG13     | <i>MATa ura3-52 can1Δ::cas9-natNT2 TRP1 LEU2 HIS3 XII-2::(GPM1p-AtPAL2-FBA1t)+(TDH3p-AtC4H-CYC1t)+(tHXT7p-AtATR2-pYX212t)+(PGK1p-CYB5-ADH1t) X-3::(TPI1p-EcaroL-pYX212t)+(ADH1t-ARO7<sup>G141S</sup>-TEF1p)+(PGK1p-ARO4<sup>K229L</sup>-CYC1t) X-4::(CYC1t-ARO1-TPI1p)+(TDH3p-ARO2-ADH1t)+(TDH2t-ARO3-TEF1p) XII-4::(TDH3p-At4CL-ADH1t) + (TDH2t-RsCHS-CCW12p)+(tHXT7p-PsCHI-FBAt) XII-3::(TDH2t-matB-TDH3p) + (tHXT7p-matC-CYC1t)</i>                                                                                                                                                                                                             | NAG010    | This work |
| NAG14     | <i>MATa ura3-52 can1Δ::cas9-natNT2 TRP1 LEU2 HIS3 XII-2::(GPM1p-AtPAL2-FBA1t)+(TDH3p-AtC4H-CYC1t)+(tHXT7p-AtATR2-pYX212t)+(PGK1p-CYB5-ADH1t) X-3::(TPI1p-EcaroL-pYX212t)+(ADH1t-ARO7<sup>G141S</sup>-TEF1p)+(PGK1p-ARO4<sup>K229L</sup>-CYC1t) X-4::(CYC1t-ARO1-TPI1p)+(TDH3p-ARO2-ADH1t)+(TDH2t-ARO3-TEF1p) XII-4::(TDH3p-At4CL-ADH1t) + (TDH2t-RsCHS-CCW12p)+(tHXT7p-PsCHI-FBAt) XI-2::(TPIp-ACC1<sup>S659A,S1157A</sup>-TDH2t) XII-3::(TDH2t-matB-TDH3p) + (tHXT7p-matC-CYC1t)</i>                                                                                                                                                              | NAG12     | This work |

|       |                                                                                                                                                                                                                                                                                                                                                                                                                                                                                                                                                                                                                                                                                      |        |           |
|-------|--------------------------------------------------------------------------------------------------------------------------------------------------------------------------------------------------------------------------------------------------------------------------------------------------------------------------------------------------------------------------------------------------------------------------------------------------------------------------------------------------------------------------------------------------------------------------------------------------------------------------------------------------------------------------------------|--------|-----------|
| NAG37 | <i>MATa ura3-52 can1Δ::cas9-natNT2 TRP1 LEU2 HIS3 XII-2::(GPM1p-AtPAL2-FBA1t)+(TDH3p-AtC4H-CYC1t)+(tHXT7p-AtATR2-pYX212t)+(PGK1p-CYB5-ADH1t) X-3::(TPI1p-EcaroL-pYX212t)+(ADH1t-ARO7<sup>G141S</sup>-TEF1p)+(PGK1p-ARO4<sup>K229L</sup>-CYC1t) X-4::(CYC1t-ARO1-TPI1p)+(TDH3p-ARO2-ADH1t)+(TDH2t-ARO3-TEF1p) XII-4::(TDH3p-At4CL-ADH1t) + (TDH2t-RsCHS-CCW12p)+(tHXT7p-PsCHI-FBAt) XII-1::(TDH3p-At4CL-ADH1t) + (TDH2t-RsCHS-CCW12p)+(tHXT7p-PsCHI-FBAt) XII-5::(pYX212t-PsCHI-PGKp)+(TEF1p-RsCHS-FBAt) + (CYC1t-At4CL-TPIp) XI-1::(pYX212t-PsCHI-PGKp)+(TEF1p-RsCHS-FBAt) XI-2: (TPIp-ACC1<sup>S659A,S1157A</sup>-TDH2t)</i>                                                        | NAG3-4 | This work |
| NAG38 | <i>MATa ura3-52 can1Δ::cas9-natNT2 TRP1 LEU2 HIS3 XII-2::(GPM1p-AtPAL2-FBA1t)+(TDH3p-AtC4H-CYC1t)+(tHXT7p-AtATR2-pYX212t)+(PGK1p-CYB5-ADH1t) X-3::(TPI1p-EcaroL-pYX212t)+(ADH1t-ARO7<sup>G141S</sup>-TEF1p)+(PGK1p-ARO4<sup>K229L</sup>-CYC1t) X-4::(CYC1t-ARO1-TPI1p)+(TDH3p-ARO2-ADH1t)+(TDH2t-ARO3-TEF1p) XII-4::(TDH3p-At4CL-ADH1t) + (TDH2t-RsCHS-CCW12p)+(tHXT7p-PsCHI-FBAt) XII-1::(TDH3p-At4CL-ADH1t) + (TDH2t-RsCHS-CCW12p)+(tHXT7p-PsCHI-FBAt) XII-5::(pYX212t-PsCHI-PGKp)+(TEF1p-RsCHS-FBAt) + (CYC1t-At4CL-TPIp) XI-1::(pYX212t-PsCHI-PGKp)+(TEF1p-RsCHS-FBAt) XII-3::(TDH2t-matB-TDH3p) + (tHXT7p-matC-CYC1t)</i>                                                       | NAG3-4 | This work |
| NAG39 | <i>MATa ura3-52 can1Δ::cas9-natNT2 TRP1 LEU2 HIS3 XII-2::(GPM1p-AtPAL2-FBA1t)+(TDH3p-AtC4H-CYC1t)+(tHXT7p-AtATR2-pYX212t)+(PGK1p-CYB5-ADH1t) X-3::(TPI1p-EcaroL-pYX212t)+(ADH1t-ARO7<sup>G141S</sup>-TEF1p)+(PGK1p-ARO4<sup>K229L</sup>-CYC1t) X-4::(CYC1t-ARO1-TPI1p)+(TDH3p-ARO2-ADH1t)+(TDH2t-ARO3-TEF1p) XII-4::(TDH3p-At4CL-ADH1t) + (TDH2t-RsCHS-CCW12p)+(tHXT7p-PsCHI-FBAt) XII-1::(TDH3p-At4CL-ADH1t) + (TDH2t-RsCHS-CCW12p)+(tHXT7p-PsCHI-FBAt) XII-5::(pYX212t-PsCHI-PGKp)+(TEF1p-RsCHS-FBAt) + (CYC1t-At4CL-TPIp) XI-1::(pYX212t-PsCHI-PGKp)+(TEF1p-RsCHS-FBAt) XI-2::(TPIp-ACC1<sup>S659A,S1157A</sup>-TDH2t) XII-3::(TDH2t-matB-TDH3p) + (tHXT7p-matC-CYC1t)</i>        | NAG37  | This work |
| NAG41 | <i>MATa ura3-52 can1Δ::cas9-natNT2 TRP1 LEU2 HIS3 X-3::(TPI1p-EcaroL-pYX212t)+(ADH1t-ARO7<sup>G141S</sup>-TEF1p)+(PGK1p-ARO4<sup>K229L</sup>-CYC1t) X-4::(CYC1t-ARO1-TPI1p)+(TDH3p-ARO2-ADH1t)+(TDH2t-ARO3-TEF1p) XII-4::(TDH3p-At4CL-ADH1t) + (TDH2t-RsCHS-CCW12p)+(tHXT7p-PsCHI-FBAt) XII-1::(TDH3p-At4CL-ADH1t) + (TDH2t-RsCHS-CCW12p)+(tHXT7p-PsCHI-FBAt) XII-5::(pYX212t-PsCHI-PGKp)+(TEF1p-RsCHS-FBAt) + (CYC1t-At4CL-TPIp) XI-1::(pYX212t-PsCHI-PGKp)+(TEF1p-RsCHS-FBAt) XI-2::(TPIp-ACC1<sup>S659A,S1157A</sup>-TDH2t) XII-3::(TDH2t-matB-TDH3p) + (tHXT7p-matC-CYC1t)</i>                                                                                                   | NAG39  | This work |
| NAG58 | <i>MATa ura3-52 can1Δ::cas9-natNT2 TRP1 LEU2 HIS3 XII-2:: TDH3p-AtC4H-CYC1t)+(tHXT7p-AtATR2-pYX212t)+(PGK1p-CYB5-ADH1t) X-3::(TPI1p-EcaroL-pYX212t)+(ADH1t-ARO7<sup>G141S</sup>-TEF1p)+(PGK1p-ARO4<sup>K229L</sup>-CYC1t) X-4::(CYC1t-ARO1-TPI1p)+(TDH3p-ARO2-ADH1t)+(TDH2t-ARO3-TEF1p) XII-4::(TDH3p-At4CL-ADH1t) + (TDH2t-RsCHS-CCW12p)+(tHXT7p-PsCHI-FBAt) XII-1::(TDH3p-At4CL-ADH1t) + (TDH2t-RsCHS-CCW12p)+(tHXT7p-PsCHI-FBAt) XII-5::(pYX212t-PsCHI-PGKp)+(TEF1p-RsCHS-FBAt) + (CYC1t-At4CL-TPIp) XI-1::(pYX212t-PsCHI-PGKp)+(TEF1p-RsCHS-FBAt) XI-2::(TPIp-ACC1<sup>S659A,S1157A</sup>-TDH2t) XII-3::(TDH2t-matB-TDH3p) + (tHXT7p-matC-CYC1t) XI-3::(GPM1p-AtPAL2-FBA1t)</i>  | NAG39  | This work |
| NAG59 | <i>MATa ura3-52 can1Δ::cas9-natNT2 TRP1 LEU2 HIS3 XII-2:: TDH3p-AtC4H-CYC1t)+(tHXT7p-AtATR2-pYX212t)+(PGK1p-CYB5-ADH1t) X-3::(TPI1p-EcaroL-pYX212t)+(ADH1t-ARO7<sup>G141S</sup>-TEF1p)+(PGK1p-ARO4<sup>K229L</sup>-CYC1t) X-4::(CYC1t-ARO1-TPI1p)+(TDH3p-ARO2-ADH1t)+(TDH2t-ARO3-TEF1p) XII-4::(TDH3p-At4CL-ADH1t) + (TDH2t-RsCHS-CCW12p)+(tHXT7p-PsCHI-FBAt) XII-1::(TDH3p-At4CL-ADH1t) + (TDH2t-RsCHS-CCW12p)+(tHXT7p-PsCHI-FBAt) XII-5::(pYX212t-PsCHI-PGKp)+(TEF1p-RsCHS-FBAt) + (CYC1t-At4CL-TPIp) XI-1::(pYX212t-PsCHI-PGKp)+(TEF1p-RsCHS-FBAt) XI-2::(TPIp-ACC1<sup>S659A,S1157A</sup>-TDH2t) XII-3::(TDH2t-matB-TDH3p) + (tHXT7p-matC-CYC1t) XI-3::(CCW12p-AtPAL2-FBA1t)</i> | NAG39  | This work |
| NAG60 | <i>MATa ura3-52 can1Δ::cas9-natNT2 TRP1 LEU2 HIS3 XII-2:: TDH3p-AtC4H-CYC1t)+(tHXT7p-AtATR2-pYX212t)+(PGK1p-CYB5-ADH1t) X-3::(TPI1p-EcaroL-pYX212t)+(ADH1t-ARO7<sup>G141S</sup>-TEF1p)+(PGK1p-ARO4<sup>K229L</sup>-CYC1t) X-4::(CYC1t-ARO1-TPI1p)+(TDH3p-ARO2-ADH1t)+(TDH2t-ARO3-TEF1p) XII-4::(TDH3p-At4CL-ADH1t) + (TDH2t-RsCHS-CCW12p)+(tHXT7p-PsCHI-FBAt) XII-1::(TDH3p-At4CL-ADH1t) + (TDH2t-RsCHS-CCW12p)+(tHXT7p-PsCHI-</i>                                                                                                                                                                                                                                                   | NAG39  | This work |



|         |                                                                                                                                                                                                                                                                                                                                                                                                                                                                                                                                                                                                                                                                                                                                                                                                                                                                                                                                          |       |           |
|---------|------------------------------------------------------------------------------------------------------------------------------------------------------------------------------------------------------------------------------------------------------------------------------------------------------------------------------------------------------------------------------------------------------------------------------------------------------------------------------------------------------------------------------------------------------------------------------------------------------------------------------------------------------------------------------------------------------------------------------------------------------------------------------------------------------------------------------------------------------------------------------------------------------------------------------------------|-------|-----------|
|         | <i>FBA1</i> ) XII-5::( <i>pYX212t-PsCHI-PGKp</i> ) + ( <i>TEF1p-RsCHS-FBA1</i> ) + ( <i>CYC1t-At4CL-TPIp</i> ) XI-1::( <i>pYX212t-PsCHI-PGKp</i> ) + ( <i>TEF1p-RsCHS-FBA1</i> ) XI-2::( <i>TPIp-ACC1</i> <sup>S659A,S1157A</sup> - <i>TDH2t</i> ) XII-3::( <i>TDH2t-matB-TDH3p</i> ) + ( <i>tHXT7p-matC-CYC1t</i> ) XI-3::( <i>CCW12_BS2p-AtPAL2-FBA1t</i> )                                                                                                                                                                                                                                                                                                                                                                                                                                                                                                                                                                            |       |           |
| NAG61   | <i>MATa ura3-52 can1Δ::cas9-natNT2 TRP1 LEU2 HIS3 XII-2:: TDH3p-AtC4H-CYC1t</i> ) + ( <i>tHXT7p-AtATR2-pYX212t</i> ) + ( <i>PGK1p-CYB5-ADH1t</i> ) X-3::( <i>TPI1p-EcaroL-pYX212t</i> ) + ( <i>ADH1t-ARO7<sup>G141S</sup>-TEF1p</i> ) + ( <i>PGK1p-ARO4<sup>K229L</sup>-CYC1t</i> ) X-4::( <i>CYC1t-ARO1-TPI1p</i> ) + ( <i>TDH3p-ARO2-ADH1t</i> ) + ( <i>TDH2t-ARO3-TEF1p</i> ) XII-4::( <i>TDH3p-At4CL-ADH1t</i> ) + ( <i>TDH2t-RsCHS-CCW12p</i> ) + ( <i>tHXT7p-PsCHI-FBA1</i> ) XII-1::( <i>TDH3p-At4CL-ADH1t</i> ) + ( <i>TDH2t-RsCHS-CCW12p</i> ) + ( <i>tHXT7p-PsCHI-FBA1</i> ) XII-5::( <i>pYX212t-PsCHI-PGKp</i> ) + ( <i>TEF1p-RsCHS-FBA1</i> ) + ( <i>CYC1t-At4CL-TPIp</i> ) XI-1::( <i>pYX212t-PsCHI-PGKp</i> ) + ( <i>TEF1p-RsCHS-FBA1</i> ) XI-2::( <i>TPIp-ACC1</i> <sup>S659A,S1157A</sup> - <i>TDH2t</i> ) XII-3::( <i>TDH2t-matB-TDH3p</i> ) + ( <i>tHXT7p-matC-CYC1t</i> ) XI-3::( <i>CCW12_BS123p-AtPAL2-FBA1t</i> ) | NAG39 | This work |
| NAG62   | <i>MATa ura3-52 can1Δ::cas9-natNT2 TRP1 LEU2 HIS3 XII-2:: TDH3p-AtC4H-CYC1t</i> ) + ( <i>tHXT7p-AtATR2-pYX212t</i> ) + ( <i>PGK1p-CYB5-ADH1t</i> ) X-3::( <i>TPI1p-EcaroL-pYX212t</i> ) + ( <i>ADH1t-ARO7<sup>G141S</sup>-TEF1p</i> ) + ( <i>PGK1p-ARO4<sup>K229L</sup>-CYC1t</i> ) X-4::( <i>CYC1t-ARO1-TPI1p</i> ) + ( <i>TDH3p-ARO2-ADH1t</i> ) + ( <i>TDH2t-ARO3-TEF1p</i> ) XII-4::( <i>TDH3p-At4CL-ADH1t</i> ) + ( <i>TDH2t-RsCHS-CCW12p</i> ) + ( <i>tHXT7p-PsCHI-FBA1</i> ) XII-1::( <i>TDH3p-At4CL-ADH1t</i> ) + ( <i>TDH2t-RsCHS-CCW12p</i> ) + ( <i>tHXT7p-PsCHI-FBA1</i> ) XII-5::( <i>pYX212t-PsCHI-PGKp</i> ) + ( <i>TEF1p-RsCHS-FBA1</i> ) + ( <i>CYC1t-At4CL-TPIp</i> ) XI-1::( <i>pYX212t-PsCHI-PGKp</i> ) + ( <i>TEF1p-RsCHS-FBA1</i> ) XI-2::( <i>TPIp-ACC1</i> <sup>S659A,S1157A</sup> - <i>TDH2t</i> ) XII-3::( <i>TDH2t-matB-TDH3p</i> ) + ( <i>tHXT7p-matC-CYC1t</i> ) XI-3::( <i>TDH3p-AtPAL2-FBA1t</i> )        | NAG39 | This work |
| NAG63   | <i>MATa ura3-52 can1Δ::cas9-natNT2 TRP1 LEU2 HIS3 XII-2:: TDH3p-AtC4H-CYC1t</i> ) + ( <i>tHXT7p-AtATR2-pYX212t</i> ) + ( <i>PGK1p-CYB5-ADH1t</i> ) X-3::( <i>TPI1p-EcaroL-pYX212t</i> ) + ( <i>ADH1t-ARO7<sup>G141S</sup>-TEF1p</i> ) + ( <i>PGK1p-ARO4<sup>K229L</sup>-CYC1t</i> ) X-4::( <i>CYC1t-ARO1-TPI1p</i> ) + ( <i>TDH3p-ARO2-ADH1t</i> ) + ( <i>TDH2t-ARO3-TEF1p</i> ) XII-4::( <i>TDH3p-At4CL-ADH1t</i> ) + ( <i>TDH2t-RsCHS-CCW12p</i> ) + ( <i>tHXT7p-PsCHI-FBA1</i> ) XII-1::( <i>TDH3p-At4CL-ADH1t</i> ) + ( <i>TDH2t-RsCHS-CCW12p</i> ) + ( <i>tHXT7p-PsCHI-FBA1</i> ) XII-5::( <i>pYX212t-PsCHI-PGKp</i> ) + ( <i>TEF1p-RsCHS-FBA1</i> ) + ( <i>CYC1t-At4CL-TPIp</i> ) XI-1::( <i>pYX212t-PsCHI-PGKp</i> ) + ( <i>TEF1p-RsCHS-FBA1</i> ) XI-2::( <i>TPIp-ACC1</i> <sup>S659A,S1157A</sup> - <i>TDH2t</i> ) XII-3::( <i>TDH2t-matB-TDH3p</i> ) + ( <i>tHXT7p-matC-CYC1t</i> ) XI-3::( <i>TDH3_BS23p-AtPAL2-FBA1t</i> )   | NAG39 | This work |
| NAG64   | <i>MATa ura3-52 can1Δ::cas9-natNT2 TRP1 LEU2 HIS3 XII-2:: TDH3p-AtC4H-CYC1t</i> ) + ( <i>tHXT7p-AtATR2-pYX212t</i> ) + ( <i>PGK1p-CYB5-ADH1t</i> ) X-3::( <i>TPI1p-EcaroL-pYX212t</i> ) + ( <i>ADH1t-ARO7<sup>G141S</sup>-TEF1p</i> ) + ( <i>PGK1p-ARO4<sup>K229L</sup>-CYC1t</i> ) X-4::( <i>CYC1t-ARO1-TPI1p</i> ) + ( <i>TDH3p-ARO2-ADH1t</i> ) + ( <i>TDH2t-ARO3-TEF1p</i> ) XII-4::( <i>TDH3p-At4CL-ADH1t</i> ) + ( <i>TDH2t-RsCHS-CCW12p</i> ) + ( <i>tHXT7p-PsCHI-FBA1</i> ) XII-1::( <i>TDH3p-At4CL-ADH1t</i> ) + ( <i>TDH2t-RsCHS-CCW12p</i> ) + ( <i>tHXT7p-PsCHI-FBA1</i> ) XII-5::( <i>pYX212t-PsCHI-PGKp</i> ) + ( <i>TEF1p-RsCHS-FBA1</i> ) + ( <i>CYC1t-At4CL-TPIp</i> ) XI-1::( <i>pYX212t-PsCHI-PGKp</i> ) + ( <i>TEF1p-RsCHS-FBA1</i> ) XI-2::( <i>TPIp-ACC1</i> <sup>S659A,S1157A</sup> - <i>TDH2t</i> ) XII-3::( <i>TDH2t-matB-TDH3p</i> ) + ( <i>tHXT7p-matC-CYC1t</i> ) XI-3::( <i>TEF1p-AtPAL2-FBA1t</i> )        | NAG39 | This work |
| NAG65   | <i>MATa ura3-52 can1Δ::cas9-natNT2 TRP1 LEU2 HIS3 XII-2:: TDH3p-AtC4H-CYC1t</i> ) + ( <i>tHXT7p-AtATR2-pYX212t</i> ) + ( <i>PGK1p-CYB5-ADH1t</i> ) X-3::( <i>TPI1p-EcaroL-pYX212t</i> ) + ( <i>ADH1t-ARO7<sup>G141S</sup>-TEF1p</i> ) + ( <i>PGK1p-ARO4<sup>K229L</sup>-CYC1t</i> ) X-4::( <i>CYC1t-ARO1-TPI1p</i> ) + ( <i>TDH3p-ARO2-ADH1t</i> ) + ( <i>TDH2t-ARO3-TEF1p</i> ) XII-4::( <i>TDH3p-At4CL-ADH1t</i> ) + ( <i>TDH2t-RsCHS-CCW12p</i> ) + ( <i>tHXT7p-PsCHI-FBA1</i> ) XII-1::( <i>TDH3p-At4CL-ADH1t</i> ) + ( <i>TDH2t-RsCHS-CCW12p</i> ) + ( <i>tHXT7p-PsCHI-FBA1</i> ) XII-5::( <i>pYX212t-PsCHI-PGKp</i> ) + ( <i>TEF1p-RsCHS-FBA1</i> ) + ( <i>CYC1t-At4CL-TPIp</i> ) XI-1::( <i>pYX212t-PsCHI-PGKp</i> ) + ( <i>TEF1p-RsCHS-FBA1</i> ) XI-2::( <i>TPIp-ACC1</i> <sup>S659A,S1157A</sup> - <i>TDH2t</i> ) XII-3::( <i>TDH2t-matB-TDH3p</i> ) + ( <i>tHXT7p-matC-CYC1t</i> ) XI-3::( <i>TEF1_BS123p-AtPAL2-FBA1t</i> )  | NAG39 | This work |
| NAG39-2 | <i>MATa ura3-52 can1Δ::cas9-natNT2 TRP1 LEU2 HIS3 XII-2::(GPM1p-AtPAL2-FBA1t)</i> + ( <i>TDH3p-AtC4H-CYC1t</i> ) + ( <i>tHXT7p-AtATR2-pYX212t</i> ) + ( <i>PGK1p-CYB5-ADH1t</i> ) X-3::( <i>TPI1p-EcaroL-pYX212t</i> ) + ( <i>ADH1t-ARO7<sup>G141S</sup>-TEF1p</i> ) + ( <i>PGK1p-ARO4<sup>K229L</sup>-CYC1t</i> ) X-4::( <i>CYC1t-ARO1-TPI1p</i> ) + ( <i>TDH3p-ARO2-ADH1t</i> ) + ( <i>TDH2t-ARO3-TEF1p</i> ) XII-4::( <i>TDH3p-At4CL-ADH1t</i> ) + ( <i>TDH2t-RsCHS-CCW12p</i> ) + ( <i>tHXT7p-PsCHI-FBA1</i> ) XII-1::( <i>TDH3p-At4CL-ADH1t</i> ) + ( <i>TDH2t-RsCHS-CCW12p</i> ) + ( <i>tHXT7p-PsCHI-FBA1</i> ) XII-5::( <i>pYX212t-PsCHI-PGKp</i> ) + ( <i>TEF1p-RsCHS-FBA1</i> ) + ( <i>CYC1t-At4CL-TPIp</i> ) XI-1::( <i>pYX212t-PsCHI-PGKp</i> ) +                                                                                                                                                                             | NAG39 | This work |

|       |                                                                                                                                                                                                                                                                                                                                                                                                                                                                                                                                                                                                                                                                                                                             |       |           |
|-------|-----------------------------------------------------------------------------------------------------------------------------------------------------------------------------------------------------------------------------------------------------------------------------------------------------------------------------------------------------------------------------------------------------------------------------------------------------------------------------------------------------------------------------------------------------------------------------------------------------------------------------------------------------------------------------------------------------------------------------|-------|-----------|
|       | (TEF1p-RsCHS-FBA1) XI-2::(TPIp-ACC1 <sup>S659A,S1157A</sup> -TDH2t) XII-3::(TDH2t-matB-TDH3p) + (tHXT7p-matC-CYC1t) X-2::(TEF1-NLS_FapR-ADH1t)                                                                                                                                                                                                                                                                                                                                                                                                                                                                                                                                                                              |       |           |
| NAG66 | MATa ura3-52 can1Δ::cas9-natNT2 TRP1 LEU2 HIS3 XII-2:: TDH3p-AtC4H-CYC1t)+(tHXT7p-AtATR2-pYX212t)+(PGK1p-CYB5-ADH1t) X-3::(TPI1p-EcaroL-pYX212t)+(ADH1t-ARO7 <sup>G141S</sup> -TEF1p)+(PGK1p-ARO4 <sup>K229L</sup> -CYC1t) X-4::(CYC1t-ARO1-TPI1p)+(TDH3p-ARO2-ADH1t)+(TDH2t-ARO3-TEF1p) XII-4::(TDH3p-At4CL-ADH1t) + (TDH2t-RsCHS-CCW12p)+(tHXT7p-PsCHI-FBA1t) XII-1::(TDH3p-At4CL-ADH1t) + (TDH2t-RsCHS-CCW12p)+(tHXT7p-PsCHI-FBA1t) XII-5::(pYX212t-PsCHI-PGKp)+ (TEF1p-RsCHS-FBA1t) + (CYC1t-At4CL-TPIp) XI-1::(pYX212t-PsCHI-PGKp)+ (TEF1p-RsCHS-FBA1t) XI-2::(TPIp-ACC1 <sup>S659A,S1157A</sup> -TDH2t) XII-3::(TDH2t-matB-TDH3p) + (tHXT7p-matC-CYC1t) XI-3::(GPM1p-AtPAL2-FBA1t) X-2::(TEF1-NLS_FapR-ADH1t)         | NAG58 | This work |
| NAG67 | MATa ura3-52 can1Δ::cas9-natNT2 TRP1 LEU2 HIS3 XII-2:: TDH3p-AtC4H-CYC1t)+(tHXT7p-AtATR2-pYX212t)+(PGK1p-CYB5-ADH1t) X-3::(TPI1p-EcaroL-pYX212t)+(ADH1t-ARO7 <sup>G141S</sup> -TEF1p)+(PGK1p-ARO4 <sup>K229L</sup> -CYC1t) X-4::(CYC1t-ARO1-TPI1p)+(TDH3p-ARO2-ADH1t)+(TDH2t-ARO3-TEF1p) XII-4::(TDH3p-At4CL-ADH1t) + (TDH2t-RsCHS-CCW12p)+(tHXT7p-PsCHI-FBA1t) XII-1::(TDH3p-At4CL-ADH1t) + (TDH2t-RsCHS-CCW12p)+(tHXT7p-PsCHI-FBA1t) XII-5::(pYX212t-PsCHI-PGKp)+ (TEF1p-RsCHS-FBA1t) + (CYC1t-At4CL-TPIp) XI-1::(pYX212t-PsCHI-PGKp)+ (TEF1p-RsCHS-FBA1t) XI-2::(TPIp-ACC1 <sup>S659A,S1157A</sup> -TDH2t) XII-3::(TDH2t-matB-TDH3p) + (tHXT7p-matC-CYC1t) XI-3::(CCW12p-AtPAL2-FBA1t) X-2::(TEF1-NLS_FapR-ADH1t)        | NAG59 | This work |
| NAG68 | MATa ura3-52 can1Δ::cas9-natNT2 TRP1 LEU2 HIS3 XII-2:: TDH3p-AtC4H-CYC1t)+(tHXT7p-AtATR2-pYX212t)+(PGK1p-CYB5-ADH1t) X-3::(TPI1p-EcaroL-pYX212t)+(ADH1t-ARO7 <sup>G141S</sup> -TEF1p)+(PGK1p-ARO4 <sup>K229L</sup> -CYC1t) X-4::(CYC1t-ARO1-TPI1p)+(TDH3p-ARO2-ADH1t)+(TDH2t-ARO3-TEF1p) XII-4::(TDH3p-At4CL-ADH1t) + (TDH2t-RsCHS-CCW12p)+(tHXT7p-PsCHI-FBA1t) XII-1::(TDH3p-At4CL-ADH1t) + (TDH2t-RsCHS-CCW12p)+(tHXT7p-PsCHI-FBA1t) XII-5::(pYX212t-PsCHI-PGKp)+ (TEF1p-RsCHS-FBA1t) + (CYC1t-At4CL-TPIp) XI-1::(pYX212t-PsCHI-PGKp)+ (TEF1p-RsCHS-FBA1t) XI-2::(TPIp-ACC1 <sup>S659A,S1157A</sup> -TDH2t) XII-3::(TDH2t-matB-TDH3p) + (tHXT7p-matC-CYC1t) XI-3::(CCW12p-BS2p-AtPAL2-FBA1t) X-2::(TEF1-NLS_FapR-ADH1t)   | NAG60 | This work |
| NAG69 | MATa ura3-52 can1Δ::cas9-natNT2 TRP1 LEU2 HIS3 XII-2:: TDH3p-AtC4H-CYC1t)+(tHXT7p-AtATR2-pYX212t)+(PGK1p-CYB5-ADH1t) X-3::(TPI1p-EcaroL-pYX212t)+(ADH1t-ARO7 <sup>G141S</sup> -TEF1p)+(PGK1p-ARO4 <sup>K229L</sup> -CYC1t) X-4::(CYC1t-ARO1-TPI1p)+(TDH3p-ARO2-ADH1t)+(TDH2t-ARO3-TEF1p) XII-4::(TDH3p-At4CL-ADH1t) + (TDH2t-RsCHS-CCW12p)+(tHXT7p-PsCHI-FBA1t) XII-1::(TDH3p-At4CL-ADH1t) + (TDH2t-RsCHS-CCW12p)+(tHXT7p-PsCHI-FBA1t) XII-5::(pYX212t-PsCHI-PGKp)+ (TEF1p-RsCHS-FBA1t) + (CYC1t-At4CL-TPIp) XI-1::(pYX212t-PsCHI-PGKp)+ (TEF1p-RsCHS-FBA1t) XI-2::(TPIp-ACC1 <sup>S659A,S1157A</sup> -TDH2t) XII-3::(TDH2t-matB-TDH3p) + (tHXT7p-matC-CYC1t) XI-3::(CCW12p-BS123p-AtPAL2-FBA1t) X-2::(TEF1-NLS_FapR-ADH1t) | NAG61 | This work |
| NAG70 | MATa ura3-52 can1Δ::cas9-natNT2 TRP1 LEU2 HIS3 XII-2:: TDH3p-AtC4H-CYC1t)+(tHXT7p-AtATR2-pYX212t)+(PGK1p-CYB5-ADH1t) X-3::(TPI1p-EcaroL-pYX212t)+(ADH1t-ARO7 <sup>G141S</sup> -TEF1p)+(PGK1p-ARO4 <sup>K229L</sup> -CYC1t) X-4::(CYC1t-ARO1-TPI1p)+(TDH3p-ARO2-ADH1t)+(TDH2t-ARO3-TEF1p) XII-4::(TDH3p-At4CL-ADH1t) + (TDH2t-RsCHS-CCW12p)+(tHXT7p-PsCHI-FBA1t) XII-1::(TDH3p-At4CL-ADH1t) + (TDH2t-RsCHS-CCW12p)+(tHXT7p-PsCHI-FBA1t) XII-5::(pYX212t-PsCHI-PGKp)+ (TEF1p-RsCHS-FBA1t) + (CYC1t-At4CL-TPIp) XI-1::(pYX212t-PsCHI-PGKp)+ (TEF1p-RsCHS-FBA1t) XI-2::(TPIp-ACC1 <sup>S659A,S1157A</sup> -TDH2t) XII-3::(TDH2t-matB-TDH3p) + (tHXT7p-matC-CYC1t) XI-3::(TDH3p-AtPAL2-FBA1t) X-2::(TEF1-NLS_FapR-ADH1t)         | NAG62 | This work |
| NAG71 | MATa ura3-52 can1Δ::cas9-natNT2 TRP1 LEU2 HIS3 XII-2:: TDH3p-AtC4H-CYC1t)+(tHXT7p-AtATR2-pYX212t)+(PGK1p-CYB5-ADH1t) X-3::(TPI1p-EcaroL-pYX212t)+(ADH1t-ARO7 <sup>G141S</sup> -TEF1p)+(PGK1p-ARO4 <sup>K229L</sup> -CYC1t) X-4::(CYC1t-ARO1-TPI1p)+(TDH3p-ARO2-ADH1t)+(TDH2t-ARO3-TEF1p) XII-4::(TDH3p-At4CL-ADH1t) + (TDH2t-RsCHS-CCW12p)+(tHXT7p-PsCHI-FBA1t) XII-1::(TDH3p-At4CL-ADH1t) + (TDH2t-RsCHS-CCW12p)+(tHXT7p-PsCHI-FBA1t) XII-5::(pYX212t-PsCHI-PGKp)+ (TEF1p-RsCHS-FBA1t) + (CYC1t-At4CL-TPIp) XI-1::(pYX212t-PsCHI-PGKp)+ (TEF1p-RsCHS-FBA1t) XI-2::(TPIp-ACC1 <sup>S659A,S1157A</sup> -TDH2t) XII-3::(TDH2t-matB-TDH3p) + (tHXT7p-matC-CYC1t) XI-3::(TDH3p-BS23p-AtPAL2-FBA1t) X-2::(TEF1-NLS_FapR-ADH1t)   | NAG63 | This work |

|           |                                                                                                                                                                                                                                                                                                                                                                                                                                                                                                                                                                                                                                                                                                                                                                                                                    |        |           |
|-----------|--------------------------------------------------------------------------------------------------------------------------------------------------------------------------------------------------------------------------------------------------------------------------------------------------------------------------------------------------------------------------------------------------------------------------------------------------------------------------------------------------------------------------------------------------------------------------------------------------------------------------------------------------------------------------------------------------------------------------------------------------------------------------------------------------------------------|--------|-----------|
| NAG72     | <i>MATa ura3-52 can1Δ::cas9-natNT2 TRP1 LEU2 HIS3 XII-2:: TDH3p-AtC4H-CYC1t)+(tHXT7p-AtATR2-pYX212t)+(PGK1p-CYB5-ADH1t) X-3::(TPI1p-EcaroL-pYX212t)+(ADH1t-ARO7<sup>G141S</sup>-TEF1p)+(PGK1p-ARO4<sup>K229L</sup>-CYC1t) X-4::(CYC1t-ARO1-TPI1p)+(TDH3p-ARO2-ADH1t)+(TDH2t-ARO3-TEF1p) XII-4::(TDH3p-At4CL-ADH1t) + (TDH2t-RsCHS-CCW12p)+(tHXT7p-PsCHI-FBA1t) XII-1::(TDH3p-At4CL-ADH1t) + (TDH2t-RsCHS-CCW12p)+(tHXT7p-PsCHI-FBA1t) XII-5::(pYX212t-PsCHI-PGKp)+ (TEF1p-RsCHS-FBA1t) + (CYC1t-At4CL-TPIp) XI-1::(pYX212t-PsCHI-PGKp)+ (TEF1p-RsCHS-FBA1t) XI-2::(TPIp-ACC1<sup>S659A,S1157A</sup>-TDH2t) XII-3::(TDH2t-matB-TDH3p) + (tHXT7p-matC-CYC1t) XI-3::(TEF1p-AtPAL2-FBA1t) X-2::(TEF1-NLS_FapR-ADH1t)</i>                                                                                               | NAG64  | This work |
| NAG73     | <i>MATa ura3-52 can1Δ::cas9-natNT2 TRP1 LEU2 HIS3 XII-2:: TDH3p-AtC4H-CYC1t)+(tHXT7p-AtATR2-pYX212t)+(PGK1p-CYB5-ADH1t) X-3::(TPI1p-EcaroL-pYX212t)+(ADH1t-ARO7<sup>G141S</sup>-TEF1p)+(PGK1p-ARO4<sup>K229L</sup>-CYC1t) X-4::(CYC1t-ARO1-TPI1p)+(TDH3p-ARO2-ADH1t)+(TDH2t-ARO3-TEF1p) XII-4::(TDH3p-At4CL-ADH1t) + (TDH2t-RsCHS-CCW12p)+(tHXT7p-PsCHI-FBA1t) XII-1::(TDH3p-At4CL-ADH1t) + (TDH2t-RsCHS-CCW12p)+(tHXT7p-PsCHI-FBA1t) XII-5::(pYX212t-PsCHI-PGKp)+ (TEF1p-RsCHS-FBA1t) + (CYC1t-At4CL-TPIp) XI-1::(pYX212t-PsCHI-PGKp)+ (TEF1p-RsCHS-FBA1t) XI-2::(TPIp-ACC1<sup>S659A,S1157A</sup>-TDH2t) XII-3::(TDH2t-matB-TDH3p) + (tHXT7p-matC-CYC1t) XI-3::(TEF1_BS123p-AtPAL2-FBA1t) X-2::(TEF1-NLS_FapR-ADH1t)</i>                                                                                         | NAG65  | This work |
| NAG74     | <i>MATa ura3-52 can1Δ::cas9-natNT2 TRP1 LEU2 HIS3 XII-2:: TDH3p-AtC4H-CYC1t)+(tHXT7p-AtATR2-pYX212t)+(PGK1p-CYB5-ADH1t) X-3::(TPI1p-EcaroL-pYX212t)+(ADH1t-ARO7<sup>G141S</sup>-TEF1p)+(PGK1p-ARO4<sup>K229L</sup>-CYC1t) X-4::(CYC1t-ARO1-TPI1p)+(TDH3p-ARO2-ADH1t)+(TDH2t-ARO3-TEF1p) XII-4::(TDH3p-At4CL-ADH1t) + (TDH2t-RsCHS-CCW12p)+(tHXT7p-PsCHI-FBA1t) XII-1::(TDH3p-At4CL-ADH1t) + (TDH2t-RsCHS-CCW12p)+(tHXT7p-PsCHI-FBA1t) XII-5::(pYX212t-PsCHI-PGKp)+ (TEF1p-RsCHS-FBA1t) + (CYC1t-At4CL-TPIp) XI-1::(pYX212t-PsCHI-PGKp)+ (TEF1p-RsCHS-FBA1t) XI-2::(TPIp-ACC1<sup>S659A,S1157A</sup>-TDH2t) XII-3::(TDH2t-matB-TDH3p) + (tHXT7p-matC-CYC1t) XI-3::(TDH3_BS23p-AtPAL2-FBA1t) X-2::(TEF1-NLS_FapR-ADH1t) FDC1::(pYX212t-DCR1-TDH3p) + (tHXT7p-AGO1-CYC1t)</i>                                         | NAG71  | This work |
| NAG75     | <i>MATa ura3-52 can1Δ::cas9-natNT2 TRP1 LEU2 HIS3 XII-2:: TDH3p-AtC4H-CYC1t)+(tHXT7p-AtATR2-pYX212t)+(PGK1p-CYB5-ADH1t) X-3::(TPI1p-EcaroL-pYX212t)+(ADH1t-ARO7<sup>G141S</sup>-TEF1p)+(PGK1p-ARO4<sup>K229L</sup>-CYC1t) X-4::(CYC1t-ARO1-TPI1p)+(TDH3p-ARO2-ADH1t)+(TDH2t-ARO3-TEF1p) XII-4::(TDH3p-At4CL-ADH1t) + (TDH2t-RsCHS-CCW12p)+(tHXT7p-PsCHI-FBA1t) XII-1::(TDH3p-At4CL-ADH1t) + (TDH2t-RsCHS-CCW12p)+(tHXT7p-PsCHI-FBA1t) XII-5::(pYX212t-PsCHI-PGKp)+ (TEF1p-RsCHS-FBA1t) + (CYC1t-At4CL-TPIp) XI-1::(pYX212t-PsCHI-PGKp)+ (TEF1p-RsCHS-FBA1t) XI-2::(TPIp-ACC1<sup>S659A,S1157A</sup>-TDH2t) XII-3::(TDH2t-matB-TDH3p) + (tHXT7p-matC-CYC1t) XI-3::(TDH3_BS23p-AtPAL2-FBA1t) X-2::(TEF1-NLS_FapR-ADH1t) FDC1::(pYX212t-DCR1-TDH3p) + (tHXT7p-AGO1-CYC1t) XI-5::(TDH3_BS23p-FAS1_200bpsRNA-TDH2t)</i> | NAG74  | This work |
| NAG76     | <i>MATa ura3-52 can1Δ::cas9-natNT2 TRP1 LEU2 HIS3 XII-2:: TDH3p-AtC4H-CYC1t)+(tHXT7p-AtATR2-pYX212t)+(PGK1p-CYB5-ADH1t) X-3::(TPI1p-EcaroL-pYX212t)+(ADH1t-ARO7<sup>G141S</sup>-TEF1p)+(PGK1p-ARO4<sup>K229L</sup>-CYC1t) X-4::(CYC1t-ARO1-TPI1p)+(TDH3p-ARO2-ADH1t)+(TDH2t-ARO3-TEF1p) XII-4::(TDH3p-At4CL-ADH1t) + (TDH2t-RsCHS-CCW12p)+(tHXT7p-PsCHI-FBA1t) XII-1::(TDH3p-At4CL-ADH1t) + (TDH2t-RsCHS-CCW12p)+(tHXT7p-PsCHI-FBA1t) XII-5::(pYX212t-PsCHI-PGKp)+ (TEF1p-RsCHS-FBA1t) + (CYC1t-At4CL-TPIp) XI-1::(pYX212t-PsCHI-PGKp)+ (TEF1p-RsCHS-FBA1t) XI-2::(TPIp-ACC1<sup>S659A,S1157A</sup>-TDH2t) XII-3::(TDH2t-matB-TDH3p) + (tHXT7p-matC-CYC1t) XI-3::(TDH3_BS23p-AtPAL2-FBA1t) X-2::(TEF1-NLS_FapR-ADH1t) FDC1::(pYX212t-DCR1-TDH3p) + (tHXT7p-AGO1-CYC1t) XI-5::(TDH3_BS23p-FAS1_250bpsRNA-TDH2t)</i> | NAG74  | This work |
| IMX581-N4 | <i>MATa ura3-52 can1Δ::cas9-natNT2 TRP1 LEU2 HIS3 XII-4::(TDH3p-At4CL-ADH1t) + (TDH2t-RsCHS-CCW12p)+(tHXT7p-PsCHI-FBA1t)</i>                                                                                                                                                                                                                                                                                                                                                                                                                                                                                                                                                                                                                                                                                       | IMX581 | This work |

**Supplementary Table 2. Plasmids used in this study.**

| <b>Plasmid ID</b> | <b>Relevant characteristics</b>                                   | <b>Origin</b> |
|-------------------|-------------------------------------------------------------------|---------------|
| pCfB1018          | <i>Template for AtPAL2 and AtC4H</i>                              | (3)           |
| pCfB0848          | <i>Template for AtATR2 and CYB5</i>                               | (3)           |
| pCfB0854          | <i>Template for At4CL1</i>                                        | (4)           |
| pCfB0826          | <i>Template for ARO4<sup>K229L</sup> and ARO7<sup>G141S</sup></i> | (3)           |
| pCfB2747          | <i>Template for EcoroL</i>                                        | (3)           |
| pAD               | <i>Template for ACC1<sup>S659A, S1157A</sup></i>                  | (5)           |
| pFDA8             | <i>Template for NLS-FapR</i>                                      | (6)           |
| pX&Y19            | <i>Template for pCCW12_BS2</i>                                    | (7)           |
| pX&Y22            | <i>Template for pCCW12_BS123</i>                                  | (7)           |
| pX&Y31            | <i>Template for pTDH3_BS23</i>                                    | (7)           |
| pFDA7             | <i>Template for pTEF1_BS123</i>                                   | (6)           |
| pGK3              | <i>Template for AGO1 and DCR1</i>                                 | (8)           |
| pQC007            | <i>2μm ampR KIURA3 gRNA-XII-2.Y</i>                               | (2)           |
| pQC010            | <i>2μm ampR KIURA3 gRNA-XII-4.Y</i>                               | (2)           |
| pQC005            | <i>2μm ampR KIURA3 gRNA-X-3.Y</i>                                 | (2)           |
| pQC008            | <i>2μm ampR KIURA3 gRNA-X-4.Y</i>                                 | (2)           |
| pQC032            | <i>2μm ampR URA3 gRNA-XII-1.Y [2x]</i>                            | (2)           |
| pQC033            | <i>2μm ampR URA3 gRNA-XII-5.Y [2x]</i>                            | (2)           |
| pQC030            | <i>2μm ampR URA3 gRNA-XI-1.Y [2x]</i>                             | (2)           |
| pQC130            | <i>2μm ampR URA3 gRNA-XI-2.Y [2x]</i>                             | (2)           |
| pQC133            | <i>2μm ampR URA3 gRNA-XII-3.Y [2x]</i>                            | (2)           |
| pQC029            | <i>2μm ampR URA3 gRNA-X-2.Y [2x]</i>                              | (2)           |
| pQC006            | <i>2μm ampR KIURA3 gRNA-XI-3.Y</i>                                | (2)           |
| pQC009            | <i>2μm ampR KIURA3 gRNA-XI-5.Y</i>                                | (2)           |
| pMEL10            | <i>2μm ampR KIURA3 gRNA-CAN1.Y</i>                                | (2)           |
| pMC005            | <i>2μm ampR URA3 gRNA-AtPAL2.Y</i>                                | This work     |

**Supplementary Table 3. Primers used in this study.**

| Plasmid ID                                                              | Name                                         | Sequence (5'-3')                                              |
|-------------------------------------------------------------------------|----------------------------------------------|---------------------------------------------------------------|
| <b>Primers for homologous regions for expression module integration</b> |                                              |                                                               |
| P001                                                                    | <i>XII-4 up-F</i>                            | GTATCCGGCTGTTCCCTTCATAG                                       |
| P002                                                                    | <i>XII-4 up-R (with TDH3p-F)<sup>a</sup></i> | CTTTGAAATGGCAGTATTGATAATGATAAACTCGATGCCATAGTATGTGTGATGG       |
| P003                                                                    | <i>XII-4 dn-F (with FBA1t-R)</i>             | CGAGTTCCTTTGTAAAGTCTTTCATAGTAGCTTACTATTCCCCATTAGAGTCAAATAAAAG |
| P004                                                                    | <i>XII-4 dn-R</i>                            | TTTCTGCCGTACCTGGATGGTCATTTTC                                  |
| P005                                                                    | <i>XII-1 up-F</i>                            | GTTGAGCTCTGTCCTTCATGG                                         |
| P006                                                                    | <i>XII-1 up-R1 (with TDH3p-F)</i>            | CTTTGAAATGGCAGTATTGATAATGATAAACTCGAGAAAGAACCGAACCGATGCC       |
| P007                                                                    | <i>XII-1 dn-F1 (with ADH1t-R)</i>            | AAATCGCTCCCCATTTACCCCAATTGTAGATATGCCTTCCCGTGAATCAACTGCAC      |
| P008                                                                    | <i>XII-1 dn-R</i>                            | CAATCCTCGCATTTCAGCTTC                                         |
| P009                                                                    | <i>XII-1 up-R2 (with pYX212t-R)</i>          | GCTCCCTTTAGGGTTCGGATTTAGTGGTTTACGGCGAAAGAACCGAACCGATGC        |
| P010                                                                    | <i>XII-1 dn-F2 (with FBA1t-R)</i>            | CGAGTTCCTTTGTAAAGTCTTTCATAGTAGCTTACTGTTTCAGTTTAGTGCTCTGTCTGAG |
| P011                                                                    | <i>XII-5 up-F</i>                            | GTAGTGATCATTGGCTTAAC                                          |
| P012                                                                    | <i>XII-5 up-R1 (with pYX212t-R)</i>          | GCTCCCTTTAGGGTTCGGATTTAGTGGTTTACGGCGTGACAATAAAATTCAAACCGGT    |
| P013                                                                    | <i>XII-5 dn-F1 (with TPI1p-F)</i>            | ATTCTAAGTAAAGTTAAATATCCGTAATCTTTAAACCAACTCAGAAGTTTGACAGC      |
| P014                                                                    | <i>XII-5 dn-R</i>                            | CTCTTTTGCCTTTCAAAAAAG                                         |
| P015                                                                    | <i>XII-5 up-R2 (with CYC1t-R)</i>            | GGACGCTCGAAGGCTTAATTTGCGGCCGGTACCCGTGACAATAAAATTCAAACCGGT     |
| P016                                                                    | <i>XII-5 dn-F2 (with FBA1t-R)</i>            | CGAGTTCCTTTGTAAAGTCTTTCATAGTAGCTTACTCAACTCAGAAGTTTGACAGC      |
| P017                                                                    | <i>XII-5 dn-F3 (with PGK1p-F)</i>            | ATGCCTATTGTGCAGATGTTATAATATCTGTGCGTCAACTCAGAAGTTTGACAGC       |
| P018                                                                    | <i>XII-5 up-R3 (with TEF1p-F)</i>            | AGAGTAAAAAAGGAGTAGAAACATTTTGAAGCTATGTGACAATAAAATTCAAACCGGT    |
| P019                                                                    | <i>XI-1 up-F</i>                             | ATTTGTGTGAAGGAATAGTGACG                                       |
| P020                                                                    | <i>XI-1 up-R1 (with pYX212t-R)</i>           | GCTCCCTTTAGGGTTCGGATTTAGTGGTTTACGGCCAATGGGCTTGGTATTCCG        |
| P021                                                                    | <i>XI-1 dn-F1 (with TPI1p-F)</i>             | ATTCTAAGTAAAGTTAAATATCCGTAATCTTTAAACTTTCTTGGCATTGGCAAATC      |
| P022                                                                    | <i>XI-1 dn-R</i>                             | AAGAGCCGAGTCCCCATCAG                                          |
| P023                                                                    | <i>XI-1 up-R2 (with CYC1t-R)</i>             | GGACGCTCGAAGGCTTAATTTGCGGCCGGTACCCCAATGGGCTTGGTATTCCG         |
| P024                                                                    | <i>XI-1 dn-F2 (with FBA1t-R)</i>             | CGAGTTCCTTTGTAAAGTCTTTCATAGTAGCTTACTTTTCTTGGCATTGGCAAATC      |
| P025                                                                    | <i>XI-1 dn-F3 (with PGK1p-F)</i>             | ATGCCTATTGTGCAGATGTTATAATATCTGTGCGTTTTCTTGGCATTGGCAAATC       |
| P026                                                                    | <i>XI-1 up-R3 (with TEF1p-F)</i>             | AGAGTAAAAAAGGAGTAGAAACATTTTGAAGCTATCAATGGGCTTGGTATTCCG        |
| P027                                                                    | <i>XII-2 up-F</i>                            | CGGCATGCAAACATCTACAC                                          |
| P028                                                                    | <i>XII-2 up-R (with GPM1p-F)</i>             | GCTCACAAATCTTAAAGTCATACATTGCACGACTACATAACGCGTTACACGGAAG       |
| P029                                                                    | <i>XII-2 dn-F (with PGK1p-F)</i>             | GCAAATGCCTATTGTGCAGATGTTTATAATATCTGTGCGTCTACTATCGGCGACTCTCTC  |
| P030                                                                    | <i>XII-2 dn-R</i>                            | GAGCGAACGTAAGAGAGGTTAATG                                      |
| P031                                                                    | <i>X-3 up-F</i>                              | CGAGATCTTTGTGTTCCGGTTACC                                      |
| P032                                                                    | <i>X-3 up-R (with TPI1p-F)</i>               | CTAAGTAAGTTAAATATCCGTAATCTTTAAACGTCTCGTATGTCGGCTCTCGC         |
| P033                                                                    | <i>X-3 dn-F (with CYC1t-R)</i>               | GACGCTCGAAGGCTTTAATTTGCGGCCGGTACCCTGTGTCGCGTTTTCTAAGGC        |
| P034                                                                    | <i>X-3 dn-R</i>                              | GAGGTGGTTATTGATCACCGGA                                        |
| P035                                                                    | <i>X-4 up-F</i>                              | CCCAAAGCTAAGAGTCCCAT                                          |
| P036                                                                    | <i>X-4 up-R (with CYC1t-R)</i>               | GACGCTCGAAGGCTTTAATTTGCGGCCGGTACCCTGCTTGAATGGCGACAG           |
| P037                                                                    | <i>X-4 dn-F (with TEF1p-F)</i>               | GAAGAGTAAAAAAGGAGTAGAAACATTTTGAAGCTATAACAGGCATGGGAAGATTCCG    |
| P038                                                                    | <i>X-4 dn-R</i>                              | CTGGTGAGGATTTACGGTATGA                                        |
| P039                                                                    | <i>X-2 up-F</i>                              | CGTCTATGAGGAGACTGTTAGTTG                                      |
| P040                                                                    | <i>X-2 up-R (with GPM1p-F)</i>               | GCTCACAAATCTTAAAGTCATACATTGCACGACTAGACCACTTCGAGAGCAAGTTG      |
| P041                                                                    | <i>X-2 dn-F (with CYC1t-R)</i>               | GACGCTCGAAGGCTTTAATTTGCGGCCGGTACCCCTGCATAATCGGCCCTCAC         |
| P042                                                                    | <i>X-2 dn-R</i>                              | CTCGCCAAGGCATTACCATC                                          |
| P043                                                                    | <i>XI-2 up-F</i>                             | TAACCTTTCGTATGAGGATTTTC                                       |
| P044                                                                    | <i>XI-2 up-R</i>                             | TTCTATGGCACATTTTCTGTGG                                        |
| P127                                                                    | <i>XI-2 dn-F</i>                             | CCACAAGTAAAGCTCGTTGAC                                         |
| P128                                                                    | <i>XI-2 dn-R</i>                             | ATGGTTGAAAAGGTTACAGAGG                                        |
| P129                                                                    | <i>XII-3 up-F</i>                            | TGTGCCCTTAAATTCATATAC                                         |
| P130                                                                    | <i>XII-3 up-R (with TDH2t-R)</i>             | TAAAGCACTTAGTATCACACTAATTGGCTTTTCGCGAATGAGCAGGTACCCCTTA       |
| P131                                                                    | <i>XII-3 dn-F (with CYC1t-R)</i>             | GGACGCTCGAAGGCTTTAATTTGCGGCCGGTACCCGCATAGAGCTAATTAGGTTTGAG    |

|      |                                   |                                                               |
|------|-----------------------------------|---------------------------------------------------------------|
| P132 | <i>XII-3 dn-R</i>                 | GAACTTACAAGCTGATTTTGGT                                        |
| P133 | <i>X-2 up-R (with TEF1p-F)</i>    | AGAGTAAAAAAGGAGTAGAAACATTTTGAAGCTATGACCACTTCGAGAGCAAGTTG      |
| P134 | <i>X-2 dn-F (with ADH1t-R)</i>    | AAATCGCTCCCCATTTACCCAATTGTAGATATGCCCTGCATAATCGGCCTCAC         |
| P135 | <i>XI-3 up-F</i>                  | AGTTACTTGCTCTATGCGTTTGC                                       |
| P136 | <i>XI-3 up-R1 (with GPM1p-F)</i>  | GCTCACAAATCTTAAAGTCATACATTGCACGACTAAATCAGACGCACGCTTGGC        |
| P137 | <i>XI-3 dn-F (with FBA1t-R)</i>   | CGAGTCTTTGTAAAGCTTTTCATAGTAGCTTACTTTACGTGGATTGAGCCAGCA        |
| P138 | <i>XI-3 dn-R</i>                  | TGAGAATCCGGACCAGCAGAT                                         |
| P139 | <i>XI-3 up-R2 (with CCW12p-F)</i> | GCCCCTTTTGGACTAACCCTGTGGTTCATGGGTGGAATCAGACGCACGCTTGGC        |
| P140 | <i>XI-3 up-R3 (with TDH3p-F)</i>  | CTTTGAAATGGCAGTATTGATAATGATAAACTCGAAATCAGACGCACGCTTGGC        |
| P141 | <i>XI-3 up-R4 (with TEF1p-F)</i>  | AGAGTAAAAAAGGAGTAGAAACATTTTGAAGCTATAATCAGACGCACGCTTGGC        |
| P142 | <i>FDC1 up-F</i>                  | CTGAGCATTTTATTACGTTACTCAAC                                    |
| P143 | <i>FDC1 up-R (with pYX212t-R)</i> | CCCTTTAGGGTTCCGATTTAGTGGTTTACGGCTTGAATATATAAATTGACAATTTCTTTTG |
| P144 | <i>FDC1 dn-F (with CYC1t-R)</i>   | GGACGCTCGAAGGCTTAAATTTGCGGCCGGTACCCTTGCCATAGACTTTCTACGG       |
| P145 | <i>FDC1 dn-R</i>                  | GTCCATTTATTTTTATGTGCTGTC                                      |
| P146 | <i>XI-5 up-F</i>                  | GCGGAGAAGTCGTTGATAGC                                          |
| P147 | <i>XI-5 up-R1 (with TDH3p-F)</i>  | CTTTGAAATGGCAGTATTGATAATGATAAACTCGATGGTGCACGGAGTTTATGG        |
| P148 | <i>XI-5 dn-F (with TDH2t-R)</i>   | TAAAGCACTTAGTATCACACTAATTGGCTTTTCGCTTGATAAACAGGTATTGGCTGC     |
| P149 | <i>XI-5 dn-R</i>                  | GATCATAGATCCGGCACTTAGAG                                       |

---

**Primers for amplification of promoters and terminators**

|      |                                  |                                                             |
|------|----------------------------------|-------------------------------------------------------------|
| P045 | <i>TDH3p-F</i>                   | TCGAGTTTATCATTATCAATACTGCC                                  |
| P046 | <i>TDH3p-R</i>                   | CATTTTGTTTGTATGTGTGTTTATTCGA                                |
| P047 | <i>ADH1t-F</i>                   | GCGAATTTCTTATGATTTATGATTTTT                                 |
| P048 | <i>ADH1t-R</i>                   | GCATATCTACAATTGGGTGAAATGG                                   |
| P049 | <i>TDH2t-F1</i>                  | ATTTAACTCCTTAAGTTACTTTAATGATTTAG                            |
| P050 | <i>TDH2t-R1 (with ADH1t-R)</i>   | AAATCGCTCCCCATTTACCCAATTGTAGATATGCGCGAAAAGCCAATTAGTGTGATAC  |
| P051 | <i>CCW12p-F</i>                  | CCACCCATGAACCACACGG                                         |
| P052 | <i>CCW12p-R</i>                  | CATTTTGTTTATTGATATAGTGTAAAGCGAATG                           |
| P053 | <i>tHXT7p-F1 (with CCW12p-F)</i> | GCCCCTTTTGGACTAACCCTGTGGTTCATGGGTGGCTCGTAGGAACAATTTCCGG     |
| P054 | <i>tHXT7p-R</i>                  | CATTTTTTGATTAATAAATAAAAAACTTTTTG                            |
| P055 | <i>FBA1t-F</i>                   | GTTAATTCAAATTAATTGATATAGTTTTTT                              |
| P056 | <i>FBA1t-R</i>                   | GATACCGTCGACCTCGAGTC                                        |
| P057 | <i>GPM1p-F</i>                   | TAGTCGTGCAATGTATGACTTTAAGA                                  |
| P058 | <i>GPM1p-R</i>                   | CATTGTTTTTATTGTAATATGTGTGTTTGT                              |
| P059 | <i>CYC1t-F</i>                   | GATACCGTCGACCTCGAGTC                                        |
| P060 | <i>CYC1t-R1</i>                  | GGGTACCGGCCGCAAATTA                                         |
| P061 | <i>pYX212t-F</i>                 | TAGGGCCCAAGCTTACG                                           |
| P062 | <i>pYX212t-R1 (with ADH1t-R)</i> | CAAATCGCTCCCCATTTACCCAATTGTAGATATGCGCCGTAACCCTAAATCGGA      |
| P063 | <i>ADH1t-F</i>                   | GCGAATTTCTTATGATTTATGATTTTT                                 |
| P064 | <i>ADH1t-R</i>                   | GCATATCTACAATTGGGTGAAATGG                                   |
| P065 | <i>PGK1p-F</i>                   | ACGCACAGATATTATAACATCTGC                                    |
| P066 | <i>PGK1p-R</i>                   | CATTTTGTTATTTTGTGTAATAAGTAGATAA                             |
| P067 | <i>TPI1p-F</i>                   | GTTTAAAGATTACGGATTTTAACTTAC                                 |
| P068 | <i>TPI1p-R</i>                   | CATTTTTAGTTTATGTATGTGTTTTTTGTAG                             |
| P069 | <i>TEF1p-F1</i>                  | ATAGCTTCAAATGTTTCTACTCCT                                    |
| P070 | <i>TEF1p-R</i>                   | CATTTTGTAATTAATAACTTAGATTAGATTGC                            |
| P071 | <i>TEF1p-F2 (with PGK1p-F)</i>   | ATGCCTATTGTGCAGATGTTATAATATCTGTGCGTATAGCTTCAAATGTTTCTACTCCT |
| P072 | <i>PGK1p-F</i>                   | ACGCACAGATATTATAACATCTGC                                    |
| P073 | <i>PGK1p-R</i>                   | CATTTTGTTATTTTGTGTAATAAGTAGATAA                             |
| P074 | <i>pYX212t-R2</i>                | GCCGTAACCCTAAATCGGA                                         |
| P075 | <i>TDH2t-R2</i>                  | GCGAAAAGCCAATTAGTGTGATAC                                    |
| P076 | <i>tHXT7p-F2</i>                 | CTCGTAGGAACAATTTCCGG                                        |
| P077 | <i>tHXT7p-F3 (with TDH3p-F)</i>  | CTTTGAAATGGCAGTATTGATAATGATAAACTCGACTCGTAGGAACAATTTCCGG     |
| P078 | <i>CYC1t-R2 (with FBA1t-R)</i>   | TCGAGTCTTTGTAAAGCTTTTCATAGTAGCTTACGGGTACCGGCCGCAAATTA       |

|      |                                 |                                                               |
|------|---------------------------------|---------------------------------------------------------------|
| P079 | <i>TEF1p-F3 (with XI-2_up)</i>  | CGGGGTGTAACCTCAACAGAAAAATGTGCCATAGAAATAGCTTCAAATGTTTCTACTCCT  |
| P080 | <i>TEF1p-R (with mACC1_up)</i>  | GAGAAGACTCGAATAAGCTTCTTCGCTCATTGTAATTAATAACTTAGATTAGATTGC     |
| P081 | <i>TDH2t-F2 (with mACC1_dn)</i> | AAGAAAAATTGTTGAAGACTTTGAAATAAAATTAAGTACTTAAAGTACTTTAATGATTTAG |
| P082 | <i>TDH2t-R3 (with XI-2_dn)</i>  | CAACTGATCAACTGGTCAACGAGCTTACTTGTGGGCGAAAAGCCAATTAGTGTGATAC    |

---

**Primers for amplification of genes**

|      |                                  |                                                                |
|------|----------------------------------|----------------------------------------------------------------|
| P164 | <i>At4CL1-F (with TDH3p-R)</i>   | ACTTAGTTTCGAATAAACACACATAAACAAACAAAATGGCTCCACAAGAACAAG         |
| P165 | <i>At4CL1-R (with ADH1t-F)</i>   | TTAATAATAAAAAATCATAAATCATAAGAAATTCGCTCACAAACCGTTAGCCAAC        |
| P166 | <i>RsCHS-F (with CCW12p-R)</i>   | CTGTCATTTCGCTTAAACACTATATCAATAAACAAAATGGTTACTGTTGAAGATGTTAG    |
| P167 | <i>RsCHS-R (with TDH2t-F)</i>    | AAACTAAATCATTAAAGTAACCTAAGGAGTTAAATTTAAGTACACAATGAATGCAAAAC    |
| P168 | <i>PsCHI-F (with tHXT7p-R)</i>   | CAAAAACAAAAAGTTTTTTTAAATTTAATCAAAAAATGGCAAACCACCATCTG          |
| P169 | <i>PsCHI-R (with FBA1t-F)</i>    | TCATTAAAAACTATATCAATTAATTTGAATTAACCTATTTTAAACAATTCAGAAATTCCTGC |
| P170 | <i>HaCHS-F (with CCW12p-R)</i>   | CTGTCATTTCGCTTAAACACTATATCAATAAACAAAATGGTTACTGTTGAAGAAG        |
| P171 | <i>HaCHS-R (with TDH2t-F)</i>    | AAACTAAATCATTAAAGTAACCTAAGGAGTTAAATTTAATTAATAGCAACTGAATG       |
| P172 | <i>SmCHS-F (with CCW12p-R)</i>   | CTGTCATTTCGCTTAAACACTATATCAATAAACAAAATGGTTACTGTTGAAGAATAC      |
| P173 | <i>SmCHS-R (with TDH2t-F)</i>    | AAACTAAATCATTAAAGTAACCTAAGGAGTTAAATTTAAGCTGCAACAGAATGC         |
| P174 | <i>PhCHI-F (with tHXT7p-R)</i>   | CAAAAACAAAAAGTTTTTTTAAATTTAATCAAAAAATGTCTCCACCAGTTTCAG         |
| P175 | <i>PsCHI-R (with FBA1t-F)</i>    | TCATTAAAAACTATATCAATTAATTTGAATTAACCTAAACACCAATAACTGGG          |
| P176 | <i>SmCHI-F (with tHXT7p-R)</i>   | CAAAAACAAAAAGTTTTTTTAAATTTAATCAAAAAATGGCTGCTGTTACTAAATTG       |
| P177 | <i>SmCHI-R (with FBA1t-F)</i>    | TCATTAAAAACTATATCAATTAATTTGAATTAACATGGCTGCTGTTACTAAATTG        |
| P178 | <i>AtPAL2-F (with GPM1p-R)</i>   | CCAAACAAACACACATATTACAATAAAAAACAAATGGATCAAATCGAAGCTATGTTG      |
| P179 | <i>AtPAL2-R (with FBA1t-F)</i>   | CTCATAAAAACTATATCAATTAATTTGAATTAACCTCAGCAGATAGGAATAGGAGCACC    |
| P180 | <i>AtC4H-F (with TDH3p-R)</i>    | GTTTCGAATAAACACACATAAACAAACAAAATGGACTTGTGTTGTTGGAAAAAG         |
| P181 | <i>AtC4H-R (with CYC1t-F)</i>    | CATAACTAATTACATGACTCGAGGTCGACGGTATCTCAACAGTTTCTTGGCTTCATAAC    |
| P182 | <i>AtATR2-F (with tHXT7p-R)</i>  | CAAAAACAAAAAGTTTTTTTAAATTTAATCAAAAAATGTCTCCTCTTCTTCATCATC      |
| P183 | <i>AtATR2-R (with pYX212t-F)</i> | CCCGGGTCGACGCGTAAGCTTGTGGGCCCTATCACCAGACATCTCTCAAGTATCTAC      |
| P184 | <i>CYB5-F (with PGK1p-R)</i>     | GTAATTATCTACTTTTTACAACAAATATAACAAAATGCCTAAAGTTTACAGTTACCAAG    |
| P185 | <i>CYB5-R (with ADH1t-F)</i>     | TTTAATAATAAAAAATCATAAATCATAAGAAATTCGCTCATTGTTCAACAAATAATAAGC   |
| P186 | <i>EcoroL-F (with TPI1p-R)</i>   | CTATAACTACAAAAACACATACATAAACTAAAAATGACACAACCTCTTTTTCTGATC      |
| P187 | <i>EcoroL-R (with pYX212t-F)</i> | GATACCCGGGTCGACGCGTAAGCTTGTGGGCCCTATCAACAATTGATCGTCTGTGCC      |
| P188 | <i>ARO7*-F (with TEF1p-R)</i>    | CATAGCAATCTAATCTAAGTTTTAATTAACAAAATGGATTTACAAAACCAGA           |
| P189 | <i>ARO7*-R (with ADH1t-F)</i>    | TATTTAATAATAAAAAATCATAAATCATAAGAAATTCGCTTACTCTTCCAACCTTCTTAGC  |
| P190 | <i>ARO4*-F (with PGK1p-R)</i>    | GTAATTATCTACTTTTTACAACAAATATAACAAAATGAGTGAATCTCCAATGTTTCG      |
| P191 | <i>ARO4*-R (with CYC1t-F)</i>    | CATAACTAATTACATGACTCGAGGTCGACGGTATCCTATTTCTGTTAACTTCTCTTCTT    |
| P192 | <i>ARO1-F (with TPI1p-R)</i>     | CTATAACTACAAAAACACATACATAAACTAAAAATGGTGCAGTTAGCCAAAGTC         |
| P193 | <i>ARO1-R (with CYC1t-F)</i>     | CATAACTAATTACATGACTCGAGGTCGACGGTATCCTACTCTTTCGTAACGGCATCA      |
| P194 | <i>ARO2-F (with TDH3p-R)</i>     | GTTTCGAATAAACACACATAAACAAACAAAATGTCAACGTTTGGGAAACTG            |
| P195 | <i>ARO2-R (with ADH1t-F)</i>     | CTTATTTAATAATAAAAAATCATAAATCATAAGAAATTCGCTTAATGAACCACGGATCTGGA |
| P196 | <i>ARO3-F (with TEF1p-R)</i>     | CATAGCAATCTAATCTAAGTTTTAATTAACAAAATGTTCAATTAACCAACGATCACGC     |
| P197 | <i>ARO3-R (with TDH2t-F)</i>     | CTAAATCATTAAAGTAACCTAAGGAGTTAAATCTATTTTTTCAAGGCCCTTTCTTC       |
| P198 | <i>PHA2-F (with GPM1p-R)</i>     | CCAAACAAACACACATATTACAATAAAAAACAAATGGCCAGCAAGACTTTGAGG         |
| P199 | <i>PHA2-R (with CYC1t-F)</i>     | ACTAATTACATGACTCGAGGTCGACGGTATCTTATTTGTGATAATATCTCTATTTCTG     |
| P200 | <i>At4CL1-F (with TPI1p-R)</i>   | TCTATAACTACAAAAACACATACATAAACTAAAAATGGCTCCACAAGAACAAG          |
| P201 | <i>At4CL1-R (with CYC1t-F)</i>   | CATAACTAATTACATGACTCGAGGTCGACGGTATCTCACAAACCGTTAGCCAAC         |
| P202 | <i>RsCHS-F (with TEF1p-R)</i>    | AAGCATAGCAATCTAATCTAAGTTTTAATTAACAAAATGGTTACTGTTGAAGATGTTAG    |
| P203 | <i>RsCHS-R (with FBA1t-F)</i>    | TCATTAAAAACTATATCAATTAATTTGAATTAACCTAAGTACACAATGAATGCAAAAC     |
| P204 | <i>PsCHI-F (with PGK1p-R)</i>    | AGTAATTATCTACTTTTTACAACAAATATAACAAAATGGCAAACCACCATCTG          |
| P205 | <i>PsCHI-R (with pYX212t-F)</i>  | ACCCGGGTCGACGCGTAAGCTTGTGGGCCCTATTTTTAACAATTCAGAAATTCCTG       |
| P206 | <i>mACC1_up 500bp-F</i>          | ATGAGCGAAGAAAGCTTATTCG                                         |
| P207 | <i>mACC1_up 500bp-R</i>          | CAATAGTGGATTCTCGGAGGC                                          |
| P208 | <i>mACC1_dn 500bp-F</i>          | ATCGTGAGAGAGAATTTGCC                                           |
| P209 | <i>mACC1_dn 500bp-R</i>          | TTATTTCAAAGTCTTCAACAATTTTTCTTTATC                              |
| P210 | <i>matB-F (with TDH3p-R)</i>     | CTTAGTTTCGAATAAACACACATAAACAAACAAAATGTCTAATCATTGTTGATGCAATG    |
| P211 | <i>matB-R (with TDH2t-F)</i>     | AAACTAAATCATTAAAGTAACCTAAGGAGTTAAATTTAAGTCTTGTGTACAAATCAGC     |

|      |                                                     |                                                               |
|------|-----------------------------------------------------|---------------------------------------------------------------|
| P212 | <i>matC-F (with tHXT7p-R)</i>                       | CAAAAACAAAAAGTTTTTTTAAATTTAATCAAAAAATGGGTATCGAATTGTTGTCTATC   |
| P213 | <i>matC-R (with CYC1t-F)</i>                        | TAAC TAATTACATGACTCGAGGTCGACGGTATCTTAAACTAAACCTGGAACAACAAAAAC |
| P223 | <i>AtPAL2-F (with CCW12p-R)</i>                     | CTGTCATTCGCTTAAACACTATATCAATAAACAAAATGGATCAAATCGAAGCTATG      |
| P224 | <i>AtPAL2-F (with TEF1p-R)</i>                      | TAGCAATCTAATCTAAGTTTTAATTACAAAATGGATCAAATCGAAGCTATG           |
| P225 | <i>AtPAL2-F (with TDH3p-R)</i>                      | TTTGAATAAACACACATAAACAAAACAAAATGGATCAAATCGAAGCTATG            |
| P226 | <i>NLS_FapR-F (with TEF1p-R)</i>                    | GCAATCTAATCTAAGTTTTAATTACAAAATGCCAAAGAAGAAGAGAAAGGTTAG        |
| P227 | <i>NLS_FapR-R (with ADH1t-F)</i>                    | TTAATAATAAAAATCATAAATCATAAAGAAATTCGCTTATGAATGTTTTGAACGATACATG |
| P228 | <i>DCR1-F (with TDH3p-R)</i>                        | GATACCCGGGTCGACGCGTAAGCTTGTGGGCCCTATCACAGATTGTTGCAATGCC       |
| P229 | <i>DCR1-R (with pYX212t-F)</i>                      | ACTTAGTTTTCGAATAAACACACATAAACAAAACAAAATGAATAGAGAAAAAGCGCC     |
| P230 | <i>AGO1-F (with tHXT7p-R)</i>                       | CAAAAACAAAAAGTTTTTTTAAATTTAATCAAAAAATGTCATCCAATTCGGAGGAG      |
| P231 | <i>AGO1-R (with CYC1t-F)</i>                        | CATAACTAATTACATGACTCGAGGTCGACGGTATCTCATATGTAGTACATGATGTCAG    |
| P232 | <i>FAS1_sense 200bp-F (with TDH3p-R)</i>            | TTTTGAATAAACACACATAAACAAAACAAAATGGACGCTTACTCCACAAG            |
| P233 | <i>FAS1_sense 200bp-R (with rad9_intron1-F)</i>     | GAAAAAAGTTCCAACACACCTGCTGCAGCAAACCCCTTCAG                     |
| P234 | <i>rad9_intron1-F</i>                               | CAGGTGTGTTGGAACTTTTTCAAACCTTACTAAACATTGAACTAATTGGTAAAGATA     |
| P235 | <i>rad9_intron1-R</i>                               | TATCTTTACCAATTAGTTTCAATGTTTAGTAAGGTTTGAAAAAAGTTCCAACACACCTG   |
| P236 | <i>FAS1_antisense 200bp-F (with rad9_intron1-R)</i> | AACATTGAACTAATTGGTAAAGATACTGCAGCAAACCCCTTCAG                  |
| P237 | <i>FAS1_antisense 200bp-R (with TDH2t-F)</i>        | AAACTAAATCATTAAAGTAACCTAAGGAGTTAAATATGGACGCTTACTCCACAAG       |
| P238 | <i>FAS1_sense 250bp-F (with TDH3p-R)</i>            | TTTTGAATAAACACACATAAACAAAACAAAATGGACGCTTACTCCACAAG            |
| P239 | <i>FAS1_sense 250bp-R (with rad9_intron1-F)</i>     | GAAAAAAGTTCCAACACACCTGAGACCTGATCGAATTGACC                     |
| P240 | <i>FAS1_antisense 250bp-F (with rad9_intron1-R)</i> | AACATTGAACTAATTGGTAAAGATAAGACCTGATCGAATTGACC                  |
| P241 | <i>FAS1_antisense 250bp-R (with TDH2t-F)</i>        | AAACTAAATCATTAAAGTAACCTAAGGAGTTAAATATGGACGCTTACTCCACAAG       |

---

**Primers for *AtPAL2* gene deletion and repair oligos**

|      |                            |                                                                                                                                                                                            |
|------|----------------------------|--------------------------------------------------------------------------------------------------------------------------------------------------------------------------------------------|
| P214 | <i>Vector backbone-F</i>   | GATCATTATCTTTCACTGCGGAGAAG                                                                                                                                                                 |
| P215 | <i>Vector backbone-R</i>   | GTTTTAGAGCTAGAAATAGCAAGTTAAAATAAGGCTAGTC                                                                                                                                                   |
| P216 | <i>Sequencing-F</i>        | CACCTTTCGAGAGGACGATG                                                                                                                                                                       |
| P217 | <i>Sequencing-R</i>        | GCTGGCCTTTTGCTCACATG                                                                                                                                                                       |
| P218 | <i>AtPAL2_gRNA</i>         | TGCGCATGTTTCGGCGTTTCAAACCTTCTCCGAGTAAAGATAAATGATCAATGGTACA<br>GCTGTTGGTTCGTTTTAGAGCTAGAAATAGCAAGTTAAAATAAGGCTAGTCCGTTATCAA<br>C                                                            |
| P219 | <i>Repair Fragment 1-F</i> | GCCATTTTTTTTTCTGTATCGGGCCCTCCTTACTGCTCTCCTCCGTGTAACGCGTTATG<br>AATTTTTATTTCACTTCTGGAACCTTTCGAGTCTTTGTAAAGTCTTTCATAGTAGCTTAC<br>GTAAGCTACTATGAAAGACTTTACAAGAAGTTCGAAGAGTTCAGAATGAAATAAAAATT |
| P220 | <i>Repair Fragment 1-R</i> | CATAACGCGTTACACGGAAGGAGAGCAGTAAGGAGGGCCCGATACAGAAAAAAAATG<br>GC                                                                                                                            |
| P221 | <i>Repair Fragment 2-F</i> | GCCATTTTTTTTTCTGTATCGGGCCCTCCTTACTGCTCTCCTCCGTGTAACGCGTTATG<br>CTACTATCGGCGACTCTCTCGAAATTTTTCTTAACGCGTCTTGTACTGCGTCTAACGCT<br>AGCGTTAGACGACGTAACAAGGACGCGTTAAGAAAAATTCGAGAGAGTCGCCGATAGT   |
| P222 | <i>Repair Fragment 2-R</i> | AGCATAACGCGTTACACGGAAGGAGAGCAGTAAGGAGGGCCCGATACAGAAAAAAA<br>TGGC                                                                                                                           |

---

<sup>a</sup> short overlap to the fragments in the parentheses were included in corresponding primers.



**Supplementary Table 4. Codon optimized genes used in this study.**

| Gene         | Sequence (5'-3')                                                                                                                                                                                                                                                                                                                                                                                                                                                                                                                                                                                                                                                                                                                                                                                                                                                                                                                                                                                                                                                                                                                                                                                                                                            |
|--------------|-------------------------------------------------------------------------------------------------------------------------------------------------------------------------------------------------------------------------------------------------------------------------------------------------------------------------------------------------------------------------------------------------------------------------------------------------------------------------------------------------------------------------------------------------------------------------------------------------------------------------------------------------------------------------------------------------------------------------------------------------------------------------------------------------------------------------------------------------------------------------------------------------------------------------------------------------------------------------------------------------------------------------------------------------------------------------------------------------------------------------------------------------------------------------------------------------------------------------------------------------------------|
| <i>HaCHS</i> | ATGGTTACTGTTGAAGAAGTTAGAAAAGCACAAAGAGCTGAAGGTCCAGCAACTGTTATGGCTATTGGTACAGCAGTT<br>CCACCAAAATTGTGTTGATCAAGCTACTTACCAGATTACTACTTCAAGAATTACAAAATCTGAACATAAGGCAGAAATTA<br>AGGAAAAGTTCCAAAAGATGTGTGATAAATCAAAAATTAAGAAAAGATATATGTACTTGAATGAAGAAGTTTTAAAAGA<br>AAATCCAAATATGTGTGCATACATGGCTCCATCTTTAGATGCTAGACAAGATATCGTTGTTGTTGAAGTTCCAAAATTG<br>GGTAAAGAAGCTGCTGTTAAAGCAATTAAGAATGGGGTCAACCAAAGTCTAAGATCACTCATTGGTTTTCTGTACT<br>ACATCAGGTGTTGATATGCCAGGTGCTGATTACCAATTGACAAAATTGTTGGGTTAAGACCATCAGTTAAGAGATTG<br>ATGATGTACCAACAAGGTTGTTTTGCAGGTGGTACAGTTTTGAGATTGGCTAAAGATTTGGCAGAAAACAATAAGGGT<br>GCTAGAGTTTTGGTTGTTTGTCTGAAATCACTGCTGTTACTTTTAGAGGTCCAAGTATACACATTTGGATTCAATAG<br>TTGGTCAAGCATTGTTGGTGACGGTGTCTGCTATTATTATTGGTCTGATCCAATTCCAGAAGTTGAAAAGCCATT<br>GTTTCAAGTTGGTTCTGCTGCTCAAACTATTTTACCAGATTGAGAGGTGCTATTGATGGTCAATTTGAGAGAAGTTGGT<br>TTAACATTCCATTTGTTGAAGGATGTTCCAGGTTTGTCTCTAAAAATGTTGAAAATCATTGACTGAAGCCTTTAAAC<br>CATTGGGTATCTCTGATTGGAAGTCTTTATTTTGGATTGCTCATCCAGGTGGTCCAGCAATTTGGATCAAGTTGAAG<br>CTAAATGTCTTTAAAGCCAGAAAATTTAGAGCAACAAGACATGTTTTGTCAGAATACGGTAACATGCTTCCAGCTTG<br>TGTTTTGTTATTTAGATGAAATGAGAAGAAAGTCTAAGGAAGATGGTTTGAAGACTACAGGTGAAGGTATTGAATG<br>GGGTGTTTTGTTGGTTTTGGTCCAGGTTTAACTGTTGAAACAGTTGTTTTGCATTGCTATTAATTA     |
| <i>RsCHS</i> | ATGGTTACTGTTGAAGATGTTAGAAGAGCACAAAGAGCTGAAGGTCCAGCAACAGTTATGGCTATTGGTACTGCAAC<br>ACCATCTAATTGTGTTGATCAATCAACTTACCAGATTCTACTTTAGAATTACAATTTCTGAACATAAGGCTGAATTA<br>AGGAAAAGTTCCAAAAGATGTGTGATAAATCAATGATTAAGAAAAGATATATGTACTTAACTGAAGAAAATTTGAAGGA<br>AAACCCATCTGTTTGTGAATATATGGCTCCATCATTAGATGCAAGACAAGATATGGTTGTTGTTGAAGTTCCAAAATTG<br>GGTAAAGAAGCTGCAACTAAAGCTATTAAGAATGGGGTCAACCAAAGTCTAAGATCACACATTTGGTTTTCTGTACT<br>ACATCAGGTGTTGATATGCCAGGTGCAGATTACCAATTGACTAAATGTTGGGTTAAGACCATCTGTTAAGAGATTG<br>ATGATGTACCAACAAGGTTGTTTTGCTGGTGGTACAGTTTTGAGATTGGCTAAAGATTTGGCAGAAAACAATAAGGGT<br>GCTAGAGTTTTGGTTGTTTGTTCAGAAATCACTGCTGTTACTTTTAGAGGTCCATCTGATACACATTTGGATTCAATGG<br>TTGGTCAAGCATTGTTGGTGACGGTGTCTGCTATTATTGTTGGTGCAGATCCAGTTCAGAAAGTTGAAAAGCCAT<br>TGTTCAAGTTGGTTCTGCTGCTCAAACTATTTTACCAGATTGAGATGGTGTCTATTGATGGTCAATTTGAGAGAAGTTGG<br>TTTGACATTCCATTTGTTGAAGGATGTTCCAGGTTTGTCTCTAAAAATATCGAAAAGCATTGACTGAAGCATTTCAA<br>CCATTGGGTATTTCTGATTGGAAGTCTATTTTCTGGATTGCTCATCCAGGTGGTCCAGCAATTTTGGATCAAGTTGAAT<br>TGAATATATCTTTGAAGCCAGAAAATTTAGAGCTACAAGACATGTTTTGTCAGAATACGGTAACATGCTTCCAGCATG<br>TGTTTTGTTATTTGGATGAAATGAGAAGAAAATCTGCTGAAGAAGGTTTAAAACTACAGGTGAAGGTTTGAATGG<br>GGTGTGTTTTGTTGGTTTTGGTCCAGGTTTACTGTTGAAACAGTTGTTTTGCATTGCTATGCTACTTAA |
| <i>SmCHS</i> | ATGGTTACTGTTGAAGAATACAGAAAGGCACAAAGAGCTGAAGGTCCAGCAACAGTTATGGCTATTGGTACTTCTACA<br>CCATCAAATTTGTTGATCAATCTGCTTACCAGATTACTTTAGAAATTAATAACTAGAATCAAGACATAAGACAGAATTA<br>GGAAAAGTTTAAAAGATGTGTGAAAATCTATGATTAAGAAAAGATATATGTACTTAACTGAAGAAAATTTGAAAAGAA<br>AAATCTAATATGTGTGCATATATGGCTCCATCATTAGATGCAAGACAAGATATCGTTGTTGTTGAAGTTCCAAAATTGG<br>GTAAGAAGCTGCACAAAAGCTATTAAGAATGGGGTCAACCAAAGTCTAAGATCACTCATTGGTTTTCTGTACTA<br>CATCAGGTGTTGATATGCCAGGTGTGATTACCAATTGACAAAATTGTTGGGTTAAGACCATCTGTTAAGAGATTGAT<br>GATGTACCAACAAGGTTGTTTTGCTGGTGGTACAGTTTTGAGATTGGCAAAAAGATTTGGCTGAAAACAATAAGGGTGC<br>AAGAGTTTGGTTGTTGTTCTGAAATCACTGCTGTTACTTTTAGAGGTCCATCTGAATCACATTTGGATTCAATGGTT<br>GGTCAAGCATTGTTGGTGACGGTGTCTGCTGCTGTTATTATTGGTCTGATCCAATTTAGGTGTTGAAAGACCATTA<br>TTTGAATTTGGTTCTGCTGCTCAAACTTTGTTACCAGATTGAGAAGGTGCAATTTGATGGTCAATTTGAGAGAAGTTGGTT<br>TGACATTCCATTTGTTGAAGATGTTCCAGGTATCATCTCTAAAAATATCGATAAATCATTAGTTGAAGCATTTCACCA<br>TTGGGTATCTCTGATTGGAAGTCTTTATTTTGGATTGCACATCCAGGTGGTCCAGCTATTTTGGATCAAGTTGAATGA<br>AATTGGGTTTGAACCCAGAAAATTTAGAGCAACTAGAGAAGTTTTGTCTAACTACGGTAACATGCTTCCAGCTTGTG<br>TTTTGTTATTTGGATGAAATGAGAAAAGCATCAGCTAAACAAGGTTTACCAACTACAGGTGAAGGTTTACAATGGG<br>GTGTTTTGTTGGTTTTGGTCCAGGTTTACTGTTGAAACATTAGTTTTGCATTCTGTTCAGCTTAA    |
| <i>PhCHI</i> | ATGTCTCCACCAGTTTCAGTTACTAAGATGCAAGTTGAAAACATGCTTTTGCACCAACAGTTAATCCAGCAGGTTCTA<br>CTAATACATTGTTTTAGCTGGTGCAGGTATAGAGGTTTTGAAAATCGAGGGTAAATTCGTTAAGTTTTACTGCTATCG<br>GTGTTTACTTGAAGAATCTGCTATCCATTTTTAGCAGAAAAGTGAAGGGTAAAACCTCCACAAGAATTAACAGATT<br>CAGTTGAATTTTTCAGAGATGTTGTTACTGGTCCATTCGAAAAGTTTACTAGAGTTACAATGATCTTGCCATTGACAGG<br>TAAACAATACTCTGAAAAGGTTGCTGAAAATTTGTTGCACATTGGAAAGGTATTGGTACTTACACAGATGATGAAGG<br>TAGAGCTATCGAAAAGTTTTGGATGTTTTAGATCAGAAACATTTCCACCAGGTGCATCTATCATGTTCACTCAATCA<br>CCATTAGGTTTGTGACAATTTCTTTTGTAAAGATGATTCAGTTACTGGTACAGCTAACGCAGTTATTGAAAATAAGC<br>AATTGCTGAAGCTGTTTGAATCAATCATCGGTAACATGGTGTCTCCAGCTGCAAAAATGTTCAAGTTGCTGAAAG<br>AGTTGCAGAATTGTTGAAGAAATCTTATGCTGAAGAAGCATCAGTTTTCGGTAAACCAGAAAATGAAAATCTACAATC<br>CCAGTTATTGGTGTAA                                                                                                                                                                                                                                                                                                                                                                                                                                                                                 |
| <i>PsCHI</i> | ATGGCAAAACCACCATCTGTTTCCAGGTGTTAACATCGAATCTTATGCTTTTCCACCAACTGTTAAACCACCAGGTTCTA<br>CTAAAACATTGTTTTAGTGGTGCAGGTGTTAGAGGTTTGAAGTTCCAAGTGGTCAATTCGTTAAGTTTACTGCTAT<br>CGGTGTTTACTTGAAGATAACGCAATCACTTCAATAGCTGTTAAGTGAAGGTTAAAACCTGCTGAAGAATTAACAGA<br>ATCTGATGATTTCTTAGAGATATCGTTACAGGTCCATTCCGAAAAGTTTACTCAAGTTACAATGATCTTGCCATTGACT                                                                                                                                                                                                                                                                                                                                                                                                                                                                                                                                                                                                                                                                                                                                                                                                                                                                                                                        |

|               |                                                                                                                                                                                                                                                                                                                                                                                                                                                                                                                                                                                                                                                                                                                                                                                                                                                                                                                                                                                                                                                                                                                                                                                                                                                                                                                                                                                                                                                                                                                                                                                                                       |
|---------------|-----------------------------------------------------------------------------------------------------------------------------------------------------------------------------------------------------------------------------------------------------------------------------------------------------------------------------------------------------------------------------------------------------------------------------------------------------------------------------------------------------------------------------------------------------------------------------------------------------------------------------------------------------------------------------------------------------------------------------------------------------------------------------------------------------------------------------------------------------------------------------------------------------------------------------------------------------------------------------------------------------------------------------------------------------------------------------------------------------------------------------------------------------------------------------------------------------------------------------------------------------------------------------------------------------------------------------------------------------------------------------------------------------------------------------------------------------------------------------------------------------------------------------------------------------------------------------------------------------------------------|
|               | GGTCAACAATACTCAGAAAAGGTTACAGAAAACGTGTTGCTTACTGGAAAGCAGTTGGTCTTACACTGATGCTGAA<br>GCATCTGCTATTGAAAAGTTTATTGAAGTTTTAAAGATGAAAAGTTTCCACCAGGTTCTCAATTTTGTCTACTCAAA<br>ACCAGAAGGTTCTTTAACAATCGGTTTTCAAAGGATGGTGTTCGCCAGAAGTTGGTAATGCAGTTGTTGAAAATAA<br>GCAATTGTCTGAAGCTGTTTTAGAATCAATCATCGGTAACATGGTGTTCGCCAGAAGCTAAACAATCATTAGCTGCA<br>AGAATTTCTGAATTGTTAAAATAA                                                                                                                                                                                                                                                                                                                                                                                                                                                                                                                                                                                                                                                                                                                                                                                                                                                                                                                                                                                                                                                                                                                                                                                                                                                            |
| <i>SmChI</i>  | ATGGCTGCTGTTACTAAATTCGAAATCGAAAACACTGTTTTCCACCAACTATGGTTAAGCCAGTTGGTTCTAACAACA<br>CTTTCTTTTTGGCTGGTGCAGGTTCAAGAGGTTAGAAAATCGAAGGTAGATTGTTAAGTTTACTGCTATCGCAGTTTA<br>CTTGGAAGAATCTGCTATTCCATTTTTAGCTGCAAAGTGGAAGGGTAAATCTCAGAAGAATTAACGATTGATTGAA<br>TTTTCAAGGATATCGTTACAGGTCCATTCGAAAAGTTTACTCAAGTTACAATGATCTTGCCATTGACTGGTAAACAAT<br>ACTCTGAAAAGGTTGCTGAAAACACTGTTGCTAACTGAAAAGCAATTGGTACTTACTCTGATGCTGAATCACAAGCAA<br>TCGAAAAGTTCTGAAACGTTTTCCAATCTGAAACATCCACATGGTGCATCAATTTTGTCTACTCAATCTCCATTGGG<br>TTCATTAACAATTTCTTTTTCAAAGGATGATTCTGTTCCATCAATCGGTAACGCTGTTATTGAAAATAAGCAATTGCTG<br>AAGCAGTTTTAGATTCAATCATCGGTAACATGGTGTTCGCCAGCTGCAAAGTGTCAATCGCTAAGAGAGTTTCTG<br>AATTGTTAGAAAAATCAAATGCTGAAGCAGTTGTTAATGAAAACCAGGTTCTGGTTTGTCAACAATTCAATAA                                                                                                                                                                                                                                                                                                                                                                                                                                                                                                                                                                                                                                                                                                                                                                                                                                                                  |
| <i>RtmatB</i> | ATGTCTAATCATTTGTTTGTGCAATGAGAGCTGCAGCTCCTGGTAATGCTCCTTTTATTAGAATCGATAACACTAGAA<br>CATGGACTTACGATGATGCAATTTGCTTTATCTGGTAGAATTGCATCAGCTATGGATGCATTGGGTATTAGACCAGGTG<br>ACAGAGTTGCTGTTCAAGTTGAAAATCTGCAGAAGCTTTGATCTTGATTTGGCATGTTTGAGATCAGGTGCTGTTTA<br>TTTGCCATTGAATACAGCATACACTTTGGCTGAATTGGATTACTTCATCGGTGACGCAGAACCAAGATTGGTTGTTGT<br>TGCTTCTCAGCAAGAGCTGGTGTGAAACTATTGCAAACCAAGAGGTGCTATTGTTGAAACATTAGATGCAGCTGG<br>TCTGTTTATTGTTAGATTGGCAAGAGATGAACCAGCTGATTTTGTGATGCATCTAGATCAGCTGATGATTTGGCA<br>GCTATTTGTACACTTCTGGTACTACAGGTAGATCAAAAGGTGCAATGTTGACACATGGTAATTTGTTGTCAAACGCTT<br>TGACTTTGAGAGATTTTTGGAGAGTTACAGCAGGTGACAGATTGATCCATGCTTTGCCAATCTCCATACATCATGGTTT<br>ATTGTTGCTACAAACGTTACTTTGTTAGCAGGTGCTTCTATGTTTTTGTGCAAGTTCGATCCAGAAGAATCTTG<br>TCTTTGATGCCACAAGCTACTATGTTGATGGGTGTTCCAACTTCTACGTTAGATTGTTGCAATCACCAGATTGGATA<br>AGCAAGCAGTTGCTAACATCAGATTGTTTATTCTGGTTCAGCACCATTGTTAGCTGAAACACATACTGAATTTCAAGC<br>AAGAAGTGGTCATGCTATTTAGAAAGATACGGTATGACAGAACTAACATGAACACTTCTAACCCATACGAAGGTAA<br>AAGAATTGCTGGTACAGTTGGTTTTCCATTGCCAGATGTTACAGTTAGAGTTACTGATCCAGCAACAGGTTTAGCTTT<br>GCCACCAGAACAACTGGTATGATCGAAATTAAGGTCCAACGTTTTTAAAGGTTACTGGAGAATGCCAGAAAAGAC<br>TGCAGCTGAATCACTGCTGATGGTTCTTTATTTCTGGTGACTTGGGTAATCGATAGAGATGGTTACGTTTATATT<br>GTTGGTCTGGTAAAGATTTGGTTATTTCTGGTGGTTACAACATCTATCCAAGGAAGTTGAAGGTGAAATCGATCAA<br>ATCGAAGGTGTTGTTGAATCAGCTGTTATTGGTGTCCACATCCAGATTTTGGTGAAGGTGTTACTGCTGTTGTTGTTA<br>GAAAACCAGGTGCAGCTTTGGATGAAAAGCAATCGTTTCTGCTTTGCAAGATAGATTGGCAAGATACAAGCAACCA<br>AAGAGAATCATCTCGCTGAAGATTTGCCAAGAAATACAATGGGTAAGTTCAAAGAATATCTTGAGACAACAATATG<br>CTGATTTGTACACAAGAACTTAA |
| <i>RtmatC</i> | ATGGGTATCGAATTGTTGCTATCGGTTTGTGATTGCTATGTTTCATCATCGCAACTATCCAACCAATTAATATGGGTG<br>CTTTGGCATTGCTGGTGCATTTGTTTTAGGTTCTATGATCATCGGTATGAAGACAAACGAAATCTTCGCTGGTTCCC<br>ATCAGATTTGTTTTGACTTTGGTTGCAGTTACATATTTGTTGCTATCGCACAAATTAATGGTACTATCGATTGGTTG<br>GTTGAATGTGCTGTTAGATTAGTTAGAGGTAGAATTGGTTGATTCCATGGGTTATGTTCTTTGGTTGCTGCAATCATCA<br>CAGGTTTTCGGTGCTTTGGGTCCAGCTGCAGTTGCTATTTGGCACCAGTTGCTTTGCTTTTCGAGTTCAATACAGAA<br>TCCATCCAGTTATGATGGGTTAATGTTATTGATGGTCTCAAGCAGGTGGTTTTTCTCCAATCTCAATCTATGGTGG<br>TATCACTAACCAATCGTTGCTAAAGCAGGTTTACCATTGCTCCAACATCTTTGTTTTATCTTCAATTTTCTTTAATTT<br>GGCTATCGCAGTTTTGGTTTTCTTTGTTTTCGGTGGTCTAGAGTTATGAAACATGATCCAGCATCATTGGGTCCATTA<br>CCAGAATTGCATCCAGAAGGTGTTTCTGCTTCAATTAGAGGTGATGGTGGTACTCCAGCTAAACCAATTAGAGAACAT<br>GCATACGGTACTGCTGCAGATACAGCTACTACATTGAGATTGAACAACGAAAGAATCACTACATTGATCGGTTTGACA<br>GCTTAGGTATCGGTGCAATGGTTTTAAGTTAATGTTGGTTAGTTGCAATGACTGTTGCTGTTGTTTTGGCATTGT<br>TATCTCCAAGACACAAAAGGCTGCAATCGATAAAGTTTCTTGGTCAACTGTTTTGTTGATCGCTGGTATCATCACATA<br>CGTTGGTGTATGAAAAAGCTGGTACTGTTGATTACGTTGCAAAATGGTATTTCTTCAATGGGTATGCCATTGTTGGT<br>GCTTTGTTGTTGTTTCACTGGTGAATGTTTCAGCTTTTGCATCTTCAACAGCTTTATTGGGTGCAATCATCCCAT<br>TGGCTGTTCCATTTTATTGCAAGGTGATATCTCTGCTATTGGTGTGTTGCTGCAATCGCAATCTCAACTACAATCGT<br>TGATACTTCCATTTTCAACAATGGTGTCTTGTGTTGCTAATGCACCAGATGATTCTAGAGAACAAGTTTTGAGA<br>CAATTGTTGATCTATTCAGCATTGATCGCTATCATCGTCCAATGTTGCTTGGTTGGTTTTTGTGTTCCAGGTTTAG<br>TTTAA                                                                                                                                                                                 |

**Supplementary Table 5. Expression modules in the integration constructs used in this study**

| ID  | DNA fragment <sup>a</sup>                                                                                   |
|-----|-------------------------------------------------------------------------------------------------------------|
| M1  | <u>XII-4 up-TDH3p-At4CL1-ADH1t +TDH2t</u>                                                                   |
| M2  | <u>ADH1t +TDH2t-HaCHS-CCW12p+tHXT7p-PhCHI-FBA1t-XII-4 dn</u>                                                |
| M3  | <u>ADH1t +TDH2t-HaCHS-CCW12p+tHXT7p-PsCHI-FBA1t-XII-4 dn</u>                                                |
| M4  | <u>ADH1t +TDH2t-HaCHS-CCW12p+tHXT7p-SmCHI-FBA1t-XII-4 dn</u>                                                |
| M5  | <u>ADH1t +TDH2t-RsCHS-CCW12p+tHXT7p-PhCHI-FBA1t-XII-4 dn</u>                                                |
| M6  | <u>ADH1t +TDH2t-RsCHS-CCW12p+tHXT7p-PsCHI-FBA1t-XII-4 dn</u>                                                |
| M7  | <u>ADH1t +TDH2t-RsCHS-CCW12p+tHXT7p-SmCHI-FBA1t-XII-4 dn</u>                                                |
| M8  | <u>ADH1t +TDH2t-SmCHS-CCW12p+tHXT7p-PhCHI-FBA1t-XII-4 dn</u>                                                |
| M9  | <u>ADH1t +TDH2t-SmCHS-CCW12p+tHXT7p-PsCHI-FBA1t-XII-4 dn</u>                                                |
| M10 | <u>ADH1t +TDH2t-SmCHS-CCW12p+tHXT7p-SmCHI-FBA1t-XII-4 dn</u>                                                |
| M11 | <u>X-3 up-TPI1p-EcaroL-pYX212t-ADH1t-ARO7<sup>G141S</sup>-TEF1p-PGK1p-ARO4<sup>K229L</sup>-CYC1t-X-3 dn</u> |
| M12 | <u>X-4 up-CYC1t-ARO1-TPI1p-TDH3p-ARO2-ADH1t-TDH2t-ARO3-TEF1p-X-4 dn</u>                                     |
| M13 | <u>X-2 up-GPM1p-PHA2-CYC1t-X-2 dn</u>                                                                       |
| M14 | <u>XII-1 up-TDH3p-At4CL1-ADH1t-XII-1 dn</u>                                                                 |
| M15 | <u>XII-1 up-TDH2t-RsCHS-CCW12p-tHXT7p-PsCHI-FBA1t-XII-1 dn</u>                                              |
| M16 | <u>XII-1 up-TDH3p-At4CL1-ADH1t-TDH2t</u>                                                                    |
| M17 | <u>ADH1t-TDH2t-RsCHS-CCW12p-tHXT7p-PsCHI-FBA1t-XII-1 dn</u>                                                 |
| M18 | <u>XII-5 up-pYX212t-PsCHI-PGKp-TEF1p-RsCHS-FBA1t-CYC1t</u>                                                  |
| M19 | <u>FBA1t-CYC1t-At4CL1-TPI1p-XII-5 dn</u>                                                                    |
| M20 | <u>XII-5 up-CYC1t-At4CL1-TPI1p-XII-5 dn</u>                                                                 |
| M21 | <u>XII-5 up-TEF1p-RsCHS-FBA1t-XII-5 dn</u>                                                                  |
| M22 | <u>XII-5 up-pYX212t-PsCHI-PGKp-XII-5 dn</u>                                                                 |
| M23 | <u>XII-5 up-pYX212t-PsCHI-PGKp-TEF1p-RsCHS-FBA1t-XII-5 dn</u>                                               |
| M24 | <u>XI-1 up-pYX212t-PsCHI-PGKp-TEF1p-RsCHS-FBA1t-CYC1t</u>                                                   |
| M25 | <u>FBA1t-CYC1t-At4CL1-TPI1p-XI-1 dn</u>                                                                     |
| M26 | <u>XI-1 up-CYC1t-At4CL1-TPI1p-XI-1 dn</u>                                                                   |
| M27 | <u>XI-1 up-TEF1p-RsCHS-FBA1t-XI-1 dn</u>                                                                    |
| M28 | <u>XI-1 up-pYX212t-PsCHI-PGKp-XI-1 dn</u>                                                                   |
| M29 | <u>XI-1 up-pYX212t-PsCHI-PGKp-TEF1p-RsCHS-FBA1t-XI-1 dn</u>                                                 |
| M30 | <u>XI-3 up-TDH2t-RsCHS-CCW12p-tHXT7p-PsCHI-FBA1t-XI-3 dn</u>                                                |
| M31 | <u>XI-2 up-TPI1p-ACC1<sup>S659A,S1157A</sup> up 500bp</u>                                                   |
| M32 | <b>ACC1<sup>S659A,S1157A</sup></b>                                                                          |
| M33 | <u>ACC1<sup>S659A,S1157A</sup> dn 500bp-TDH2t-XI-2 dn</u>                                                   |
| M34 | <u>XII-3 up-TDH2t-matB-TDH3p-tHXT7p</u>                                                                     |
| M35 | <u>TDH3p-tHXT7p-matC-CYC1t-XII-3 dn</u>                                                                     |
| M36 | <u>X-2 up-TEF1-NLS_FapR-ADH1t-X-2 dn</u>                                                                    |
| M37 | <u>XI-3 up-GPM1p-AtPAL2-FBA1t-XI-3 dn</u>                                                                   |
| M38 | <u>XI-3 up-CCW12p-AtPAL2-FBA1t-XI-3 dn</u>                                                                  |
| M39 | <u>XI-3 up-CCW12p_BS2-AtPAL2-FBA1t-XI-3 dn</u>                                                              |
| M40 | <u>XI-3 up-CCW12p_BS123-AtPAL2-FBA1t-XI-3 dn</u>                                                            |
| M41 | <u>XI-3 up-TDH3p-AtPAL2-FBA1t-XI-3 dn</u>                                                                   |
| M42 | <u>XI-3 up-TDH3p_BS23-AtPAL2-FBA1t-XI-3 dn</u>                                                              |
| M43 | <u>XI-3 up-TEF1p-AtPAL2-FBA1t-XI-3 dn</u>                                                                   |
| M44 | <u>XI-3 up-TEF1p_BS123-AtPAL2-FBA1t-XI-3 dn</u>                                                             |
| M45 | <u>FDC1 up-pYX212t-DCR1-TDH3p-tHXT7p</u>                                                                    |
| M46 | <u>TDH3p-tHXT7p-AGO1-CYC1t-FDC1 dn</u>                                                                      |
| M47 | <u>XI-5 up-TDH3p-FAS1_sense 200bp-rad9_intron1 80bp</u>                                                     |
| M48 | <u>XI-5 up-TDH3p-FAS1_sense 250bp-rad9_intron1 80bp</u>                                                     |

M49 *XI-5*<sub>up</sub>-*TDH3*<sub>BS23p</sub>-*FAS1*<sub>sense</sub> 200bp-*rad9*<sub>intron1</sub> 80bp  
M50 *XI-5*<sub>up</sub>-*TDH3*<sub>BS23p</sub>-*FAS1*<sub>sense</sub> 250bp-*rad9*<sub>intron1</sub> 80bp  
M51 *rad9*<sub>intron1</sub> 80bp-*FAS1*<sub>antisense</sub> 200bp-*TDH2*<sub>t</sub>-*XI-5*<sub>dn</sub>  
M52 *rad9*<sub>intron1</sub> 80bp-*FAS1*<sub>antisense</sub> 250bp-*TDH2*<sub>t</sub>-*XI-5*<sub>dn</sub>

---

<sup>a</sup> Bold font indicates genes expressed; *p*, indicates promoter; *t*, indicates terminator; underline, indicates up-stream (up) and down-stream (dn) sequences for Cas9-mediated homologous recombination.

## Reference

1. Mans R, *et al.* (2015) CRISPR/Cas9: a molecular Swiss army knife for simultaneous introduction of multiple genetic modifications in *Saccharomyces cerevisiae*. *FEMS Yeast Res* 15(2).
2. Liu Q, *et al.* (2019) Rewiring carbon metabolism in yeast for high level production of aromatic chemicals. *Nat Commun* 10(1):4976.
3. Rodriguez A, Kildegaard KR, Li M, Borodina I, & Nielsen J (2015) Establishment of a yeast platform strain for production of p-coumaric acid through metabolic engineering of aromatic amino acid biosynthesis. *Metab Eng* 31:181-188.
4. Li M, *et al.* (2015) De novo production of resveratrol from glucose or ethanol by engineered *Saccharomyces cerevisiae*. *Metab Eng* 32:1-11.
5. Shi S, Chen Y, Siewers V, & Nielsen J (2014) Improving production of malonyl coenzyme A-derived metabolites by abolishing Snf1-dependent regulation of Acc1. *mBio* 5(3):e01130-01114.
6. David F, Nielsen J, & Siewers V (2016) Flux Control at the Malonyl-CoA Node through Hierarchical Dynamic Pathway Regulation in *Saccharomyces cerevisiae*. *ACS Synth Biol* 5(3):224-233.
7. Dabirian Y, *et al.* (2019) Expanding the Dynamic Range of a Transcription Factor-Based Biosensor in *Saccharomyces cerevisiae*. *ACS Synth Biol* 8(9):1968-1975.
8. Wang G, *et al.* (2019) RNAi expression tuning, microfluidic screening, and genome recombineering for improved protein production in *Saccharomyces cerevisiae*. *Proc Natl Acad Sci U S A* 116(19):9324-9332.
